# Supplementary material
Source: PubMed Central journal article supplement (PMC7749196)
Supplement: glz191_suppl_supplementary_material_kuo.pdf [file glz191_suppl_supplementary_material_kuo.pdf]

# Supplementary Figure 1 SNPs near *SH2B3* associated with combined parents' attained age

Plotted SNPs

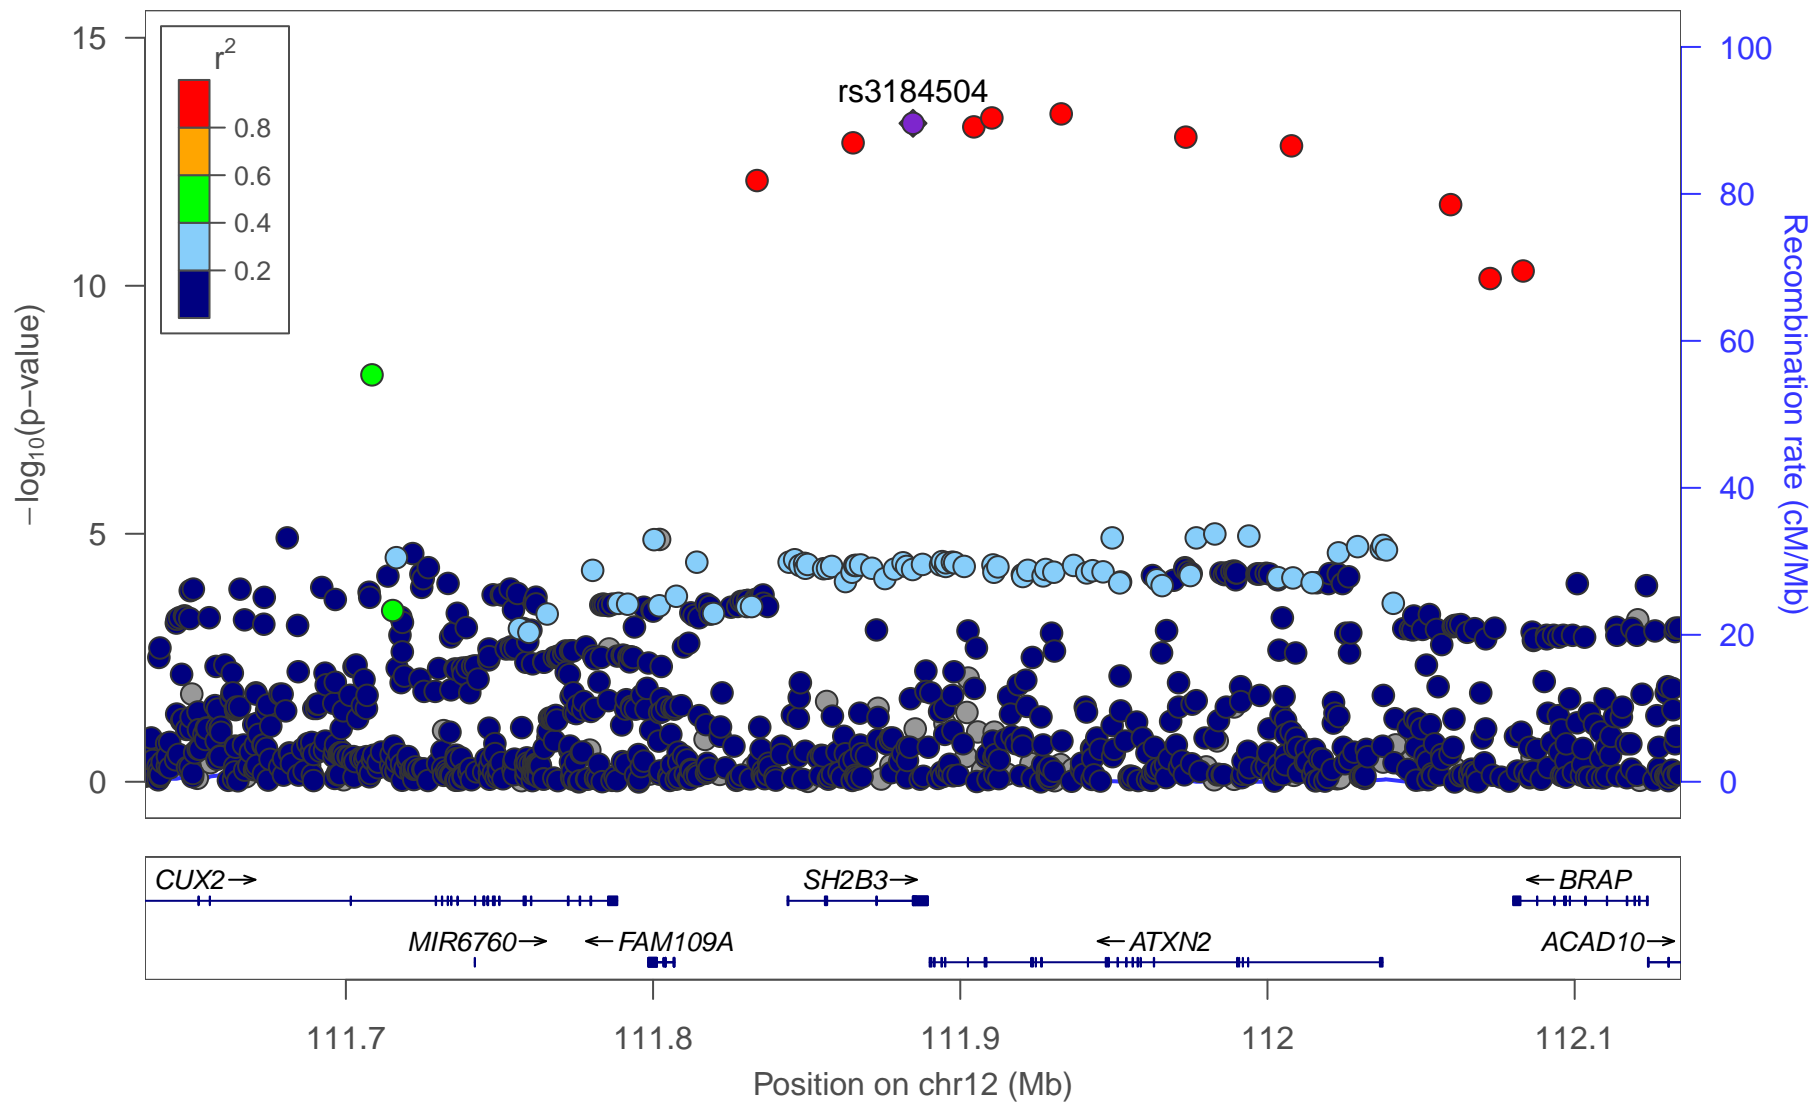

**Supplementary Table 1 Ten genetic variants in LD with rs3184504 association with combined parents' attained age (Pilling 2017, Aging)**

Results available from [https://figshare.com/articles/Pilling\\_et\\_al\\_2017\\_UKB\\_parents\\_attained\\_age\\_GWAS/5439382](https://figshare.com/articles/Pilling_et_al_2017_UKB_parents_attained_age_GWAS/5439382)

SNP: dnSNP name of genetic marker, if available

CHR: chromosome

BP: base-pair position on CHR (hg19 / b37)

ALLELE1: effect allele

ALLELE0: non-effect allele

A1FREQ: frequency of ALLELE1

BETA: effect size from BOLT-LMM approximation to infinitesimal mixed model

SE: standard error of effect size

P\_BOLT\_LMM: non-infinitesimal mixed model association test p-value

R2 with rs3184504: from LD Link reference population GBR (British in England and Scotland)

P conditional 1: SNP p-value when adjusted for rs3184504 in the linear regressions model with combined parents age at death

(z-transformed mothers + z-transformed fathers) as the outcome, adjusted for age, sex, assessment center, genotyping array, and PC1-10

P conditional 2: rs3184504 p-value when adjusted for SNP in the linear regressions model with combined parents age at death

(z-transformed mothers + z-transformed fathers) as the outcome, adjusted for age, sex, assessment center, genotyping array, and PC1-10

| SNP        | CHR | BP        | ALLELE1 | ALLELE0 | A1FREQ   | BETA     | SE       | P_BOLT_LMM | R2 with rs3184504 | P conditional 1 | P conditional 2 |
|------------|-----|-----------|---------|---------|----------|----------|----------|------------|-------------------|-----------------|-----------------|
| rs3184504  | 12  | 111884608 | T       | C       | 0.482374 | 0.016848 | 0.002239 | 5.30E-14   |                   |                 |                 |
| rs10774624 | 12  | 111833788 | G       | A       | 0.486552 | 0.016229 | 0.002261 | 7.50E-13   | 0.8941            | 0.4131          | 0.1639          |
| rs7310615  | 12  | 111865049 | C       | G       | 0.482106 | 0.016699 | 0.002255 | 1.30E-13   | 1                 | 0.7531          | 0.3157          |
| rs4766578  | 12  | 111904371 | T       | A       | 0.495617 | 0.016825 | 0.002239 | 6.20E-14   | 0.957             | 0.5988          | 0.2745          |
| rs10774625 | 12  | 111910219 | A       | G       | 0.496021 | 0.016935 | 0.002238 | 4.10E-14   | 0.957             | 0.5043          | 0.3313          |
| rs7137828  | 12  | 111932800 | C       | T       | 0.483373 | 0.017001 | 0.002241 | 3.40E-14   | 1                 | 0.7263          | 0.3455          |
| rs597808   | 12  | 111973358 | A       | G       | 0.483653 | 0.016706 | 0.002245 | 1.00E-13   | 0.9783            | 0.4603          | 0.1653          |
| rs653178   | 12  | 112007756 | C       | T       | 0.483103 | 0.016546 | 0.002239 | 1.50E-13   | 0.9565            | 0.2594          | 0.0733          |
| rs11065979 | 12  | 112059557 | C       | T       | 0.562141 | -0.01586 | 0.00226  | 2.30E-12   | 0.8763            | 0.3120          | 0.0427          |
| rs11065987 | 12  | 112072424 | A       | G       | 0.584649 | -0.01479 | 0.00227  | 7.10E-11   | 0.802             | 0.8485          | 0.0002          |
| rs11065991 | 12  | 112083162 | C       | T       | 0.585446 | -0.01492 | 0.002271 | 5.00E-11   | 0.802             | 0.9160          | 0.0006          |

**Supplementary Table 2 A list of aging traits to associate with rs3184504, summarized for each of the three genotypes, and the power**

| Category                   | Trait                                                | TT     |                                           | CT      |                                           | CC      |                                           | ALL     |                                           | Power |
|----------------------------|------------------------------------------------------|--------|-------------------------------------------|---------|-------------------------------------------|---------|-------------------------------------------|---------|-------------------------------------------|-------|
|                            |                                                      | n      | freq. (%) or mean ± SD or median (Q1, Q3) | n       | freq. (%) or mean ± SD or median (Q1, Q3) | n       | freq. (%) or mean ± SD or median (Q1, Q3) | n       | freq. (%) or mean ± SD or median (Q1, Q3) |       |
| Baseline phenotype         | Albumin-Creatinine ratio ≥ 3 mg/mmol                 | 85,978 | 4582 (5.33%)                              | 184,111 | 9512 (5.17%)                              | 98,715  | 4955 (5.02%)                              | 368,804 | 19049 (5.17%)                             | 1.00  |
| Disease                    | Any cancer excluding non-melanoma cancers            | 88,394 | 12037 (13.62%)                            | 189,192 | 26176 (13.84%)                            | 101,552 | 14483 (14.26%)                            | 379,138 | 52696 (13.9%)                             | 1.00  |
| Disease                    | Any-cause anemia (mild or more severe)               | 88,393 | 12559 (14.21%)                            | 189,192 | 28530 (15.08%)                            | 101,552 | 16394 (16.14%)                            | 379,137 | 57483 (15.16%)                            | 1.00  |
| Disease                    | Asthma                                               | 88,394 | 11131 (12.59%)                            | 189,192 | 24660 (13.03%)                            | 101,552 | 13384 (13.18%)                            | 379,138 | 49175 (12.97%)                            | 1.00  |
| Disease                    | Atrial Fibrillation                                  | 88,394 | 3305 (3.74%)                              | 189,192 | 6970 (3.68%)                              | 101,552 | 3724 (3.67%)                              | 379,138 | 13999 (3.69%)                             | 1.00  |
| Baseline phenotype         | Back pain 3+ months                                  | 88,167 | 15308 (17.36%)                            | 188,774 | 32395 (17.16%)                            | 101,318 | 17814 (17.58%)                            | 378,259 | 65517 (17.32%)                            | 1.00  |
| Disease                    | Breast cancer (women only)                           | 47,733 | 2779 (5.82%)                              | 101,697 | 6106 (6%)                                 | 54,774  | 3497 (6.38%)                              | 204,204 | 12382 (6.06%)                             | 1.00  |
| Disease                    | Colorectal Cancer                                    | 88,394 | 1051 (1.19%)                              | 189,192 | 2299 (1.22%)                              | 101,552 | 1312 (1.29%)                              | 379,138 | 4662 (1.23%)                              | 0.81  |
| Disease                    | COPD                                                 | 88,394 | 3036 (3.43%)                              | 189,192 | 6536 (3.45%)                              | 101,552 | 3422 (3.37%)                              | 379,138 | 12994 (3.43%)                             | 1.00  |
| Disease                    | Coronary heart disease                               | 88,394 | 7742 (8.76%)                              | 189,192 | 15866 (8.39%)                             | 101,552 | 8081 (7.96%)                              | 379,138 | 31689 (8.36%)                             | 1.00  |
| Baseline phenotype         | Depression                                           | 69,256 | 3775 (5.45%)                              | 148,068 | 8238 (5.56%)                              | 78,974  | 4367 (5.53%)                              | 296,298 | 16380 (5.53%)                             | 1.00  |
| Baseline phenotype         | Diastolic blood pressure (mm Hg)                     | 82,513 | 82.63 ± 10.69                             | 176,889 | 82.17 ± 10.66                             | 95,314  | 81.84 ± 10.67                             | 354,716 | 82.19 ± 10.67                             | 1.00  |
| Baseline phenotype         | Falls in the last year                               | 88,340 | 17391 (19.69%)                            | 189,170 | 37100 (19.61%)                            | 101,527 | 20175 (19.87%)                            | 379,037 | 74666 (19.7%)                             | 1.00  |
| Baseline phenotype         | FEV1                                                 | 57,271 | 2.87 ± 0.76                               | 122,101 | 2.86 ± 0.76                               | 65,664  | 2.86 ± 0.76                               | 245,036 | 2.86 ± 0.76                               | 1.00  |
| Baseline phenotype         | FEV1/FVC                                             | 57,271 | 0.76 ± 0.06                               | 122,101 | 0.76 ± 0.06                               | 65,664  | 0.76 ± 0.06                               | 245,036 | 0.76 ± 0.06                               | 1.00  |
| Baseline phenotype         | Frailty index - 49 items                             | 73,173 | 5.25 (3.25, 7.75)                         | 156,363 | 5.25 (3.25, 7.75)                         | 83,697  | 5.25 (3.25, 7.75)                         | 313,233 | 5.25 (3.25, 7.75)                         | 1.00  |
| Baseline phenotype         | Fried frailty (=frail)                               | 34,002 | 1244 (3.66%)                              | 71,980  | 2605 (3.62%)                              | 38,668  | 1376 (3.56%)                              | 144,650 | 5225 (3.61%)                              | 0.88  |
| Baseline phenotype         | FVC                                                  | 57,271 | 3.78 ± 0.96                               | 122,101 | 3.78 ± 0.96                               | 65,664  | 3.77 ± 0.96                               | 245,036 | 3.78 ± 0.96                               | 1.00  |
| Disease                    | Heart failure                                        | 88,394 | 1271 (1.44%)                              | 189,192 | 2593 (1.37%)                              | 101,552 | 1370 (1.35%)                              | 379,138 | 5234 (1.38%)                              | 0.87  |
| Baseline phenotype         | Heel bone mineral density                            | 50,492 | 0.54 ± 0.14                               | 108,201 | 0.54 ± 0.14                               | 57,884  | 0.54 ± 0.14                               | 216,577 | 0.54 ± 0.14                               | 1.00  |
| Hematological measure      | High basophil count                                  | 60,971 | 1749 (2.87%)                              | 130,228 | 3581 (2.75%)                              | 69,876  | 1755 (2.51%)                              | 261,075 | 7085 (2.71%)                              | 0.97  |
| Hematological measure      | High eosinophil count                                | 83,236 | 480 (0.58%)                               | 176,914 | 912 (0.52%)                               | 94,205  | 412 (0.44%)                               | 354,355 | 1804 (0.51%)                              | 0.24  |
| Hematological measure      | High lymphocyte count                                | 85,418 | 410 (0.48%)                               | 182,972 | 781 (0.43%)                               | 98,252  | 334 (0.34%)                               | 366,642 | 1525 (0.42%)                              | 0.18  |
| Hematological measure      | High mean platelet (thrombocyte) volume              | 83,889 | 4431 (5.28%)                              | 179,738 | 9586 (5.33%)                              | 96,625  | 5105 (5.28%)                              | 360,252 | 19122 (5.31%)                             | 1.00  |
| Hematological measure      | High monocyte count                                  | 84,889 | 271 (0.32%)                               | 181,826 | 586 (0.32%)                               | 97,599  | 281 (0.29%)                               | 364,314 | 1138 (0.31%)                              | 0.11  |
| Hematological measure      | High neutrophil count                                | 85,409 | 3500 (4.1%)                               | 182,886 | 7092 (3.88%)                              | 98,228  | 3678 (3.74%)                              | 366,523 | 14270 (3.89%)                             | 1.00  |
| Hematological measure      | High platelet count                                  | 81,847 | 1912 (2.34%)                              | 174,154 | 3034 (1.74%)                              | 92,808  | 1352 (1.46%)                              | 348,809 | 6298 (1.81%)                              | 0.94  |
| Hematological measure      | High platelet distribution width                     | 85,816 | 1186 (1.38%)                              | 183,867 | 2492 (1.36%)                              | 98,751  | 1287 (1.3%)                               | 368,434 | 4965 (1.35%)                              | 0.85  |
| Hematological measure      | High red blood cell (erythrocyte) count              | 79,463 | 826 (1.04%)                               | 169,470 | 1570 (0.93%)                              | 90,562  | 743 (0.82%)                               | 339,495 | 3139 (0.92%)                              | 0.55  |
| Hematological measure      | High red blood cell (erythrocyte) distribution width | 84,701 | 3273 (3.86%)                              | 181,373 | 7005 (3.86%)                              | 97,474  | 3742 (3.84%)                              | 363,548 | 14020 (3.86%)                             | 1.00  |
| Hematological measure      | High reticulocyte count                              | 83,601 | 3555 (4.25%)                              | 178,764 | 6691 (3.74%)                              | 95,900  | 3216 (3.35%)                              | 358,265 | 13462 (3.76%)                             | 1.00  |
| Hematological measure      | High white blood cell (leukocyte) count              | 85,318 | 6875 (8.06%)                              | 182,629 | 13189 (7.22%)                             | 97,922  | 6544 (6.68%)                              | 365,869 | 26608 (7.27%)                             | 1.00  |
| Baseline phenotype         | Hip pain 3+ months                                   | 88,258 | 7772 (8.81%)                              | 188,953 | 16368 (8.66%)                             | 101,440 | 8745 (8.62%)                              | 378,651 | 32885 (8.68%)                             | 1.00  |
| Disease                    | Hypertension                                         | 88,394 | 29616 (33.5%)                             | 189,192 | 59943 (31.68%)                            | 101,552 | 31231 (30.75%)                            | 379,138 | 120790 (31.86%)                           | 1.00  |
| Disease                    | Hypothyroidism                                       | 88,393 | 6220 (7.04%)                              | 189,189 | 10858 (5.74%)                             | 101,550 | 4909 (4.83%)                              | 379,132 | 21987 (5.8%)                              | 1.00  |
| Baseline phenotype         | Knee pain 3+ months                                  | 88,206 | 14577 (16.53%)                            | 188,840 | 31257 (16.55%)                            | 101,399 | 16786 (16.55%)                            | 378,445 | 62620 (16.55%)                            | 1.00  |
| Baseline phenotype         | Low hand grip strength                               | 88,140 | 10315 (11.7%)                             | 188,731 | 21748 (11.52%)                            | 101,306 | 11593 (11.44%)                            | 378,177 | 43656 (11.54%)                            | 1.00  |
| Hematological measure      | Low hemoglobin concentration                         | 85,495 | 1797 (2.1%)                               | 183,247 | 3861 (2.11%)                              | 98,408  | 2239 (2.28%)                              | 367,150 | 7897 (2.15%)                              | 0.99  |
| Baseline phenotype         | Low muscle mass                                      | 86,890 | 35731 (41.12%)                            | 186,113 | 74870 (40.23%)                            | 99,990  | 39765 (39.77%)                            | 372,993 | 150366 (40.31%)                           | 1.00  |
| Disease                    | Osteoarthritis                                       | 88,393 | 8906 (10.08%)                             | 189,189 | 19344 (10.22%)                            | 101,550 | 10370 (10.21%)                            | 379,132 | 38620 (10.19%)                            | 1.00  |
| Disease                    | Osteoporosis                                         | 88,393 | 2424 (2.74%)                              | 189,189 | 5032 (2.66%)                              | 101,550 | 2599 (2.56%)                              | 379,132 | 10055 (2.65%)                             | 1.00  |
| Parental extreme longevity | Parents at least one top 1% survival in UK Biobank   | 16,630 | 821 (4.94%)                               | 34,776  | 1820 (5.23%)                              | 18,472  | 1047 (5.67%)                              | 69,878  | 3688 (5.28%)                              | 0.69  |
| Disease                    | Pneumonia                                            | 88,394 | 3094 (3.5%)                               | 189,192 | 6500 (3.44%)                              | 101,552 | 3643 (3.59%)                              | 379,138 | 13237 (3.49%)                             | 1.00  |
| Disease                    | Prostate cancer (men only)                           | 40,661 | 1657 (4.08%)                              | 87,495  | 3497 (4%)                                 | 46,778  | 1897 (4.06%)                              | 174,934 | 7051 (4.03%)                              | 0.97  |
| Baseline phenotype         | Reaction time                                        | 87,954 | 536 (480, 610)                            | 188,295 | 535 (480, 608)                            | 101,059 | 535 (477, 606)                            | 377,308 | 535 (480, 609)                            | 1.00  |
| Disease                    | Renal failure                                        | 88,394 | 1010 (1.14%)                              | 189,192 | 2147 (1.13%)                              | 101,552 | 1054 (1.04%)                              | 379,138 | 4211 (1.11%)                              | 0.75  |
| Disease                    | Rheumatoid arthritis                                 | 88,393 | 1533 (1.73%)                              | 189,189 | 3068 (1.62%)                              | 101,550 | 1585 (1.56%)                              | 379,132 | 6186 (1.63%)                              | 0.94  |
| Disease                    | Stroke                                               | 88,394 | 2525 (2.86%)                              | 189,192 | 5023 (2.65%)                              | 101,552 | 2666 (2.63%)                              | 379,138 | 10214 (2.69%)                             | 1.00  |
| Baseline phenotype         | Systolic blood pressure (mm Hg)                      | 82,508 | 140.4 ± 19.71                             | 176,888 | 139.86 ± 19.62                            | 95,310  | 139.6 ± 19.69                             | 354,706 | 139.91 ± 19.66                            | 1.00  |
| Disease                    | Type 1 diabetes                                      | 88,394 | 713 (0.81%)                               | 189,192 | 1286 (0.68%)                              | 101,552 | 634 (0.62%)                               | 379,138 | 2633 (0.69%)                              | 0.44  |
| Disease                    | Type 2 diabetes                                      | 88,394 | 4225 (4.78%)                              | 189,192 | 8645 (4.57%)                              | 101,552 | 4553 (4.48%)                              | 379,138 | 17423 (4.6%)                              | 1.00  |
| Baseline phenotype         | Visual memory errors                                 | 88,459 | 3 (2, 6)                                  | 189,341 | 3 (2, 6)                                  | 101,616 | 3 (2, 6)                                  | 379,416 | 3 (2, 6)                                  | 1.00  |

1. freq. (%): frequency and percentage with the status for categorical traits

2. mean ± SD: mean and standard deviation for continuous traits

3. median (Q1, Q3): median, the first and the third quartile for continuous traits that are skewed

4. Power to detect an OR = 1.2 or 0.83 (multiplicative inverse of 1.2) or a SD change = 0.1 or -0.1 at the Bonferroni-corrected level (0.05/52 = 0.00096)

Supplementary Table 3 Association results using all samples, 60 or older, men or women only

| Category                          | Outcome                                                   | Effect Size      | Estimate      | ALL           |               |                 | P              | Bonferroni-ac | Estimate      | 60 or older   |                 |               | P             | Estimate      | Men only        |               |               | Estimate        | Women only      |           |   |
|-----------------------------------|-----------------------------------------------------------|------------------|---------------|---------------|---------------|-----------------|----------------|---------------|---------------|---------------|-----------------|---------------|---------------|---------------|-----------------|---------------|---------------|-----------------|-----------------|-----------|---|
|                                   |                                                           |                  |               | LOWER         | UPPER         | UPPER           |                |               |               | LOWER         | UPPER           | UPPER         |               |               | LOWER           | UPPER         | UPPER         |                 | LOWER           | UPPER     | P |
| <b>Parental extreme longevity</b> | <b>Parents at least one top 1% survival in UK Biobank</b> | <b>OR</b>        | <b>1.08</b>   | <b>1.03</b>   | <b>1.14</b>   | <b>9.06E-04</b> | <b>0.048</b>   | <b>NA</b>     | <b>NA</b>     | <b>NA</b>     | <b>NA</b>       | <b>NA</b>     | <b>NA</b>     | <b>NA</b>     | <b>NA</b>       | <b>NA</b>     | <b>NA</b>     | <b>NA</b>       | <b>NA</b>       | <b>NA</b> |   |
| Baseline phenotype                | Albumin-Creatinine ratio ≥ 3 mg/mmol                      | OR               | 0.97          | 0.95          | 0.99          | 0.003           | 0.176          | 0.98          | 0.96          | 1.01          | 0.217           | 0.97          | 0.94          | 1.00          | 0.036           | 0.97          | 0.94          | 1.00            | 0.041           |           |   |
| Baseline phenotype                | Back pain 3+ months                                       | OR               | 1.01          | 1.00          | 1.02          | 0.182           | 1.000          | 1.02          | 1.00          | 1.04          | 0.054           | 1.00          | 0.98          | 1.02          | 0.860           | 1.02          | 1.00          | 1.03            | 0.052           |           |   |
| Baseline phenotype                | Depression                                                | OR               | 1.00          | 0.98          | 1.03          | 0.694           | 1.000          | 1.02          | 0.98          | 1.06          | 0.427           | 0.98          | 0.94          | 1.01          | 0.176           | 1.02          | 0.99          | 1.05            | 0.105           |           |   |
| <b>Baseline phenotype</b>         | <b>Diastolic blood pressure</b>                           | <b>SD change</b> | <b>-0.037</b> | <b>-0.042</b> | <b>-0.033</b> | <b>3.67E-57</b> | <b>1.9E-55</b> | <b>-0.036</b> | <b>-0.043</b> | <b>-0.029</b> | <b>3.12E-24</b> | <b>-0.036</b> | <b>-0.043</b> | <b>-0.029</b> | <b>5.68E-25</b> | <b>-0.039</b> | <b>-0.045</b> | <b>-0.033</b>   | <b>4.01E-34</b> |           |   |
| Baseline phenotype                | Falls in the last year                                    | OR               | 1.01          | 1.00          | 1.02          | 0.230           | 1.000          | 1.01          | 0.99          | 1.02          | 0.483           | 1.00          | 0.98          | 1.02          | 0.754           | 1.01          | 0.99          | 1.02            | 0.210           |           |   |
| Baseline phenotype                | FEV1                                                      | SD change        | -0.003        | -0.007        | 0.001         | 0.185           | 1.000          | -0.006        | -0.013        | 0.000         | 0.047           | -0.001        | -0.009        | 0.006         | 0.709           | -0.005        | -0.012        | 0.001           | 0.104           |           |   |
| Baseline phenotype                | FEV1/FVC                                                  | SD change        | 0.004         | -0.001        | 0.009         | 0.153           | 1.000          | 0.006         | -0.002        | 0.014         | 0.149           | 0.005         | -0.004        | 0.013         | 0.272           | 0.003         | -0.004        | 0.011           | 0.359           |           |   |
| Baseline phenotype                | Frailty index - 49 items (log-transformed)                | SD change        | -0.004        | -0.009        | 0.000         | 0.075           | 1.000          | -0.009        | -0.016        | -0.001        | 0.019           | -0.009        | -0.016        | -0.002        | 0.012           | 0.000         | -0.007        | 0.006           | 0.888           |           |   |
| Baseline phenotype                | Fried frailty (=frail)                                    | OR               | 0.98          | 0.95          | 1.02          | 0.413           | 1.000          | 0.98          | 0.95          | 1.02          | 0.412           | 1.00          | 0.95          | 1.06          | 0.884           | 0.96          | 0.91          | 1.02            | 0.191           |           |   |
| Baseline phenotype                | FVC                                                       | SD change        | -0.004        | -0.008        | 0.000         | 0.031           | 1.000          | -0.009        | -0.015        | -0.003        | 0.003           | -0.004        | -0.011        | 0.004         | 0.356           | -0.008        | -0.014        | -0.001          | 0.024           |           |   |
| Baseline phenotype                | Heel bone mineral density                                 | SD change        | -0.006        | -0.012        | 0.000         | 0.048           | 1.000          | -0.004        | -0.012        | 0.005         | 0.430           | -0.007        | -0.016        | 0.002         | 0.106           | -0.004        | -0.012        | 0.004           | 0.286           |           |   |
| Baseline phenotype                | Hip pain 3+ months                                        | OR               | 0.99          | 0.97          | 1.00          | 0.141           | 1.000          | 0.99          | 0.97          | 1.01          | 0.403           | 0.99          | 0.96          | 1.01          | 0.328           | 0.99          | 0.97          | 1.01            | 0.268           |           |   |
| Baseline phenotype                | Knee pain 3+ months                                       | OR               | 1.00          | 0.99          | 1.01          | 0.925           | 1.000          | 0.99          | 0.98          | 1.01          | 0.427           | 1.00          | 0.98          | 1.02          | 0.976           | 1.00          | 0.98          | 1.02            | 0.938           |           |   |
| Baseline phenotype                | Low hand grip strength                                    | OR               | 0.99          | 0.97          | 1.00          | 0.054           | 1.000          | 0.98          | 0.96          | 1.00          | 0.056           | 0.96          | 0.94          | 0.99          | 0.005           | 1.00          | 0.98          | 1.01            | 0.599           |           |   |
| <b>Baseline phenotype</b>         | <b>Low muscle mass</b>                                    | <b>OR</b>        | <b>0.97</b>   | <b>0.96</b>   | <b>0.98</b>   | <b>1.87E-08</b> | <b>9.9E-07</b> | <b>0.98</b>   | <b>0.96</b>   | <b>0.99</b>   | <b>4.53E-04</b> | <b>0.97</b>   | <b>0.95</b>   | <b>0.98</b>   | <b>2.73E-06</b> | <b>0.98</b>   | <b>0.97</b>   | <b>0.99</b>     | <b>7.21E-04</b> |           |   |
| Baseline phenotype                | Reaction time (log transformed)                           | SD change        | -0.012        | -0.017        | -0.008        | 9.85E-09        | 5.2E-07        | -0.017        | -0.023        | -0.010        | 7.87E-07        | -0.013        | -0.019        | -0.006        | 9.99E-05        | -0.012        | -0.018        | -0.007          | 2.50E-05        |           |   |
| <b>Baseline phenotype</b>         | <b>Systolic blood pressure</b>                            | <b>SD change</b> | <b>-0.020</b> | <b>-0.024</b> | <b>-0.015</b> | <b>6.81E-19</b> | <b>3.6E-17</b> | <b>-0.019</b> | <b>-0.026</b> | <b>-0.012</b> | <b>5.10E-08</b> | <b>-0.018</b> | <b>-0.024</b> | <b>-0.011</b> | <b>1.25E-07</b> | <b>-0.022</b> | <b>-0.027</b> | <b>-0.016</b>   | <b>4.14E-13</b> |           |   |
| Baseline phenotype                | Visual memory errors (log+1 transformed)                  | SD change        | 0.000         | -0.004        | 0.005         | 0.847           | 1.000          | -0.001        | -0.008        | 0.006         | 0.793           | 0.005         | -0.002        | 0.011         | 0.162           | -0.003        | -0.009        | 0.003           | 0.292           |           |   |
| <b>Hematological measure</b>      | <b>High basophil count</b>                                | <b>OR</b>        | <b>0.94</b>   | <b>0.91</b>   | <b>0.97</b>   | <b>1.48E-04</b> | <b>7.8E-03</b> | <b>0.92</b>   | <b>0.87</b>   | <b>0.97</b>   | <b>1.65E-03</b> | <b>0.90</b>   | <b>0.85</b>   | <b>0.95</b>   | <b>1.31E-04</b> | <b>0.96</b>   | <b>0.92</b>   | <b>1.00</b>     | <b>6.08E-02</b> |           |   |
| <b>Hematological measure</b>      | <b>High eosinophil count</b>                              | <b>OR</b>        | <b>0.87</b>   | <b>0.82</b>   | <b>0.93</b>   | <b>3.69E-05</b> | <b>2.0E-03</b> | <b>0.88</b>   | <b>0.80</b>   | <b>0.98</b>   | <b>1.49E-02</b> | <b>0.87</b>   | <b>0.80</b>   | <b>0.96</b>   | <b>3.70E-03</b> | <b>0.87</b>   | <b>0.79</b>   | <b>0.95</b>     | <b>3.40E-03</b> |           |   |
| <b>Hematological measure</b>      | <b>High lymphocyte count</b>                              | <b>OR</b>        | <b>0.84</b>   | <b>0.79</b>   | <b>0.91</b>   | <b>3.23E-06</b> | <b>1.7E-04</b> | <b>0.83</b>   | <b>0.76</b>   | <b>0.91</b>   | <b>7.87E-05</b> | <b>0.91</b>   | <b>0.82</b>   | <b>1.02</b>   | <b>1.01E-01</b> | <b>0.79</b>   | <b>0.72</b>   | <b>0.87</b>     | <b>1.77E-06</b> |           |   |
| Hematological measure             | High mean platelet (thrombocyte) volume                   | OR               | 1.00          | 0.98          | 1.02          | 0.978           | 1.000          | 1.01          | 0.98          | 1.04          | 0.698           | 1.02          | 0.99          | 1.06          | 0.162           | 0.98          | 0.96          | 1.01            | 0.250           |           |   |
| Hematological measure             | High monocyte count                                       | OR               | 0.95          | 0.87          | 1.03          | 0.181           | 1.000          | 0.93          | 0.83          | 1.03          | 0.174           | 0.95          | 0.85          | 1.05          | 0.313           | 0.94          | 0.83          | 1.07            | 0.374           |           |   |
| <b>Hematological measure</b>      | <b>High neutrophil count</b>                              | <b>OR</b>        | <b>0.95</b>   | <b>0.93</b>   | <b>0.98</b>   | <b>9.88E-05</b> | <b>5.2E-03</b> | <b>0.94</b>   | <b>0.91</b>   | <b>0.98</b>   | <b>1.52E-03</b> | <b>0.94</b>   | <b>0.90</b>   | <b>0.97</b>   | <b>9.01E-05</b> | <b>0.97</b>   | <b>0.94</b>   | <b>1.01</b>     | <b>1.21E-01</b> |           |   |
| <b>Hematological measure</b>      | <b>High platelet count</b>                                | <b>OR</b>        | <b>0.78</b>   | <b>0.75</b>   | <b>0.81</b>   | <b>1.30E-42</b> | <b>6.9E-41</b> | <b>0.81</b>   | <b>0.76</b>   | <b>0.85</b>   | <b>4.08E-14</b> | <b>0.85</b>   | <b>0.79</b>   | <b>0.91</b>   | <b>2.44E-06</b> | <b>0.76</b>   | <b>0.73</b>   | <b>0.79</b>     | <b>3.63E-39</b> |           |   |
| Hematological measure             | High platelet distribution width                          | OR               | 0.97          | 0.93          | 1.01          | 0.152           | 1.000          | 0.95          | 0.90          | 1.01          | 0.080           | 0.96          | 0.91          | 1.01          | 0.119           | 0.99          | 0.93          | 1.05            | 0.709           |           |   |
| <b>Hematological measure</b>      | <b>High red blood cell (erythrocyte) count</b>            | <b>OR</b>        | <b>0.88</b>   | <b>0.84</b>   | <b>0.93</b>   | <b>1.18E-06</b> | <b>6.3E-05</b> | <b>0.88</b>   | <b>0.82</b>   | <b>0.95</b>   | <b>8.71E-04</b> | <b>0.89</b>   | <b>0.84</b>   | <b>0.94</b>   | <b>7.61E-06</b> | <b>0.78</b>   | <b>0.63</b>   | <b>0.98</b>     | <b>2.97E-02</b> |           |   |
| Hematological measure             | High red blood cell (erythrocyte) distribution width      | OR               | 1.00          | 0.97          | 1.02          | 0.819           | 1.000          | 1.01          | 0.98          | 1.05          | 0.551           | 1.00          | 0.96          | 1.04          | 0.865           | 0.99          | 0.97          | 1.02            | 0.713           |           |   |
| <b>Hematological measure</b>      | <b>High reticulocyte count</b>                            | <b>OR</b>        | <b>0.88</b>   | <b>0.86</b>   | <b>0.90</b>   | <b>4.01E-24</b> | <b>2.1E-22</b> | <b>0.90</b>   | <b>0.86</b>   | <b>0.93</b>   | <b>1.50E-08</b> | <b>0.87</b>   | <b>0.85</b>   | <b>0.90</b>   | <b>2.44E-18</b> | <b>0.90</b>   | <b>0.86</b>   | <b>0.93</b>     | <b>1.58E-07</b> |           |   |
| <b>Hematological measure</b>      | <b>High white blood cell (leukocyte) count</b>            | <b>OR</b>        | <b>0.90</b>   | <b>0.89</b>   | <b>0.92</b>   | <b>1.73E-29</b> | <b>9.2E-28</b> | <b>0.90</b>   | <b>0.88</b>   | <b>0.93</b>   | <b>1.29E-14</b> | <b>0.90</b>   | <b>0.88</b>   | <b>0.93</b>   | <b>6.88E-15</b> | <b>0.90</b>   | <b>0.88</b>   | <b>0.93</b>     | <b>4.63E-16</b> |           |   |
| Hematological measure             | Low hemoglobin concentration                              | OR               | 1.04          | 1.01          | 1.08          | 0.007           | 0.386          | 1.05          | 1.01          | 1.10          | 0.023           | 1.06          | 1.01          | 1.10          | 0.011           | 1.03          | 0.98          | 1.08            | 0.224           |           |   |
| <b>Disease</b>                    | <b>Any cancer excluding non-melanoma cancers</b>          | <b>OR</b>        | <b>1.03</b>   | <b>1.02</b>   | <b>1.04</b>   | <b>9.49E-06</b> | <b>5.0E-04</b> | <b>1.03</b>   | <b>1.02</b>   | <b>1.05</b>   | <b>6.53E-05</b> | <b>1.01</b>   | <b>0.99</b>   | <b>1.03</b>   | <b>3.23E-01</b> | <b>1.05</b>   | <b>1.03</b>   | <b>1.06</b>     | <b>5.19E-07</b> |           |   |
| <b>Disease</b>                    | <b>Any-cause anemia (mild or more severe)</b>             | <b>OR</b>        | <b>1.09</b>   | <b>1.08</b>   | <b>1.11</b>   | <b>8.62E-37</b> | <b>4.6E-35</b> | <b>1.10</b>   | <b>1.08</b>   | <b>1.12</b>   | <b>3.50E-30</b> | <b>0.97</b>   | <b>0.92</b>   | <b>1.01</b>   | <b>1.68E-01</b> | <b>1.10</b>   | <b>1.09</b>   | <b>1.12</b>     | <b>6.61E-42</b> |           |   |
| Disease                           | Asthma                                                    | OR               | 1.02          | 1.01          | 1.04          | 0.001           | 0.032          | 1.01          | 0.99          | 1.03          | 0.308           | 1.03          | 1.01          | 1.05          | 0.003           | 1.02          | 1.00          | 1.04            | 0.047           |           |   |
| Disease                           | Atrial Fibrillation                                       | OR               | 0.99          | 0.97          | 1.02          | 0.471           | 1.000          | 0.99          | 0.97          | 1.02          | 0.441           | 0.99          | 0.96          | 1.02          | 0.478           | 0.99          | 0.95          | 1.04            | 0.802           |           |   |
| <b>Disease</b>                    | <b>Breast cancer (women only)</b>                         | <b>OR</b>        | <b>1.05</b>   | <b>1.03</b>   | <b>1.08</b>   | <b>7.44E-05</b> | <b>3.9E-03</b> | <b>1.06</b>   | <b>1.03</b>   | <b>1.09</b>   | <b>1.89E-04</b> | <b>NA</b>     | <b>NA</b>     | <b>NA</b>     | <b>1.05</b>     | <b>1.03</b>   | <b>1.08</b>   | <b>7.44E-05</b> |                 |           |   |
| Disease                           | Colorectal Cancer                                         | OR               | 1.05          | 1.00          | 1.09          | 0.029           | 1.000          | 1.04          | 1.00          | 1.09          | 0.079           | 1.06          | 1.00          | 1.12          | 0.042           | 1.03          | 0.97          | 1.10            | 0.328           |           |   |
| Disease                           | COPD                                                      | OR               | 0.99          | 0.96          | 1.01          | 0.348           | 1.000          | 0.99          | 0.96          | 1.01          | 0.354           | 0.97          | 0.94          | 1.00          | 0.069           | 1.01          | 0.97          | 1.05            | 0.560           |           |   |
| <b>Disease</b>                    | <b>Coronary heart disease</b>                             | <b>OR</b>        | <b>0.95</b>   | <b>0.93</b>   | <b>0.96</b>   | <b>3.43E-10</b> | <b>1.8E-08</b> | <b>0.94</b>   | <b>0.92</b>   | <b>0.96</b>   | <b>2.37E-11</b> | <b>0.94</b>   | <b>0.93</b>   | <b>0.96</b>   | <b>7.57E-08</b> | <b>0.95</b>   | <b>0.93</b>   | <b>0.98</b>     | <b>1.18E-03</b> |           |   |
| Disease                           | Heart failure                                             | OR               | 0.97          | 0.93          | 1.01          | 0.116           | 1.000          | 0.97          | 0.93          | 1.01          | 0.137           | 0.96          | 0.92          | 1.01          | 0.114           | 0.98          | 0.92          | 1.06            | 0.652           |           |   |
| <b>Disease</b>                    | <b>Hypertension</b>                                       | <b>OR</b>        | <b>0.94</b>   | <b>0.93</b>   | <b>0.94</b>   | <b>6.90E-39</b> | <b>3.7E-37</b> | <b>0.93</b>   | <b>0.92</b>   | <b>0.95</b>   | <b>2.66E-31</b> | <b>0.93</b>   | <b>0.92</b>   | <b>0.94</b>   | <b>2.41E-22</b> | <b>0.94</b>   | <b>0.93</b>   | <b>0.95</b>     | <b>2.72E-18</b> |           |   |
| <b>Disease</b>                    | <b>Hypothyroidism</b>                                     | <b>OR</b>        | <b>0.81</b>   | <b>0.80</b>   | <b>0.83</b>   | <b>1.42E-94</b> | <b>7.5E-93</b> | <b>0.81</b>   | <b>0.80</b>   | <b>0.83</b>   | <b>5.21E-75</b> | <b>0.82</b>   | <b>0.78</b>   | <b>0.86</b>   | <b>1.51E-17</b> | <b>0.81</b>   | <b>0.80</b>   | <b>0.83</b>     | <b>8.40E-79</b> |           |   |
| Disease                           | Osteoarthritis                                            | OR               | 1.01          | 0.99          | 1.02          | 0.234           | 1.000          | 1.01          | 0.99          | 1.02          | 0.483           | 1.02          | 0.99          | 1.04          | 0.221           | 1.01          | 0.99          | 1.02            | 0.604           |           |   |
| Disease                           | Osteoporosis                                              | OR               | 0.97          | 0.94          | 0.99          | 0.018           | 0.928          | 0.97          | 0.94          | 1.00          | 0.032           | 0.92          | 0.86          | 0.99          | 0.018           | 0.98          | 0.95          | 1.01            | 0.130           |           |   |
| Disease                           | Pneumonia                                                 | OR               | 1.01          | 0.99          | 1.04          | 0.269           | 1.000          | 1.01          | 0.98          | 1.04          | 0.459           | 1.00          | 0.97          | 1.03          | 0.908           | 1.03          | 1.00          | 1.07            | 0.076           |           |   |
| Disease                           | Prostate cancer (men only)                                | OR               | 1.00          | 0.97          | 1.04          | 0.881           | 1.000          | 1.00          | 0.96          | 1.03          | 0.938           | 1.00          | 0.97          | 1.04          | 0.881           | NA            | NA            | NA              | NA              |           |   |
| Disease                           | Renal failure                                             | OR               | 0.95          | 0.91          | 1.00          | 0.030           | 1.000          | 0.96          | 0.91          | 1.00          | 0.052           | 0.93          | 0.88          | 0.98          | 0.012           | 0.98          | 0.92          | 1.05            | 0.640           |           |   |
| Disease                           | Rheumatoid arthritis                                      | OR               | 0.95          | 0.91          | 0.98          | 0.003           | 0.164          | 0.96          | 0.92          | 0.99          | 0.023           | 0.97          | 0.91          | 1.03          | 0.313           | 0.94          | 0.90          | 0.98            | 0.004           |           |   |
| Disease                           | Stroke                                                    | OR               | 0.96          | 0.93          | 0.99          | 0.004           |                |               |               |               |                 |               |               |               |                 |               |               |                 |                 |           |   |

**Supplementary Table 4 Conditional analyses for associations between aging-related traits and SNPs in SH2B3 using all samples, without and with adjustment for rs3184504**

| Trait                                                 | SNP        | CHR | BP        | Effect Allele |    |        | Effect Size | SNP Effect |       |       | Conditional SNP Effect |          |       |       |       |
|-------------------------------------------------------|------------|-----|-----------|---------------|----|--------|-------------|------------|-------|-------|------------------------|----------|-------|-------|-------|
|                                                       |            |     |           | A1            | A2 | A1FREQ |             | Estimate   | Lower | Upper | P                      | Estimate | Lower | Upper | P     |
| Any-cause anemia                                      | rs10774624 | 12  | 111833788 | G             | A  | 0.49   | Odds Ratio  | 1.09       | 1.07  | 1.1   | 1.71E-34               | 1.02     | 0.97  | 1.06  | 0.461 |
| Any-cause anemia                                      | rs7310615  | 12  | 111865049 | C             | G  | 0.48   | Odds Ratio  | 1.09       | 1.08  | 1.11  | 9.30E-37               | 1.04     | 0.91  | 1.19  | 0.556 |
| Any-cause anemia                                      | rs3184504  | 12  | 111884608 | T             | C  | 0.48   | Odds Ratio  | 1.09       | 1.08  | 1.11  | 8.62E-37               | NA       | NA    | NA    | NA    |
| Any-cause anemia                                      | rs4766578  | 12  | 111904371 | T             | A  | 0.50   | Odds Ratio  | 1.09       | 1.07  | 1.1   | 1.71E-34               | 0.99     | 0.94  | 1.05  | 0.772 |
| Any-cause anemia                                      | rs10774625 | 12  | 111910219 | A             | G  | 0.50   | Odds Ratio  | 1.09       | 1.07  | 1.1   | 1.96E-34               | 0.99     | 0.94  | 1.05  | 0.768 |
| Any-cause anemia                                      | rs7137828  | 12  | 111932800 | C             | T  | 0.48   | Odds Ratio  | 1.09       | 1.08  | 1.11  | 4.21E-37               | 1.1      | 0.94  | 1.29  | 0.233 |
| Any-cause anemia                                      | rs597808   | 12  | 111973358 | A             | G  | 0.48   | Odds Ratio  | 1.09       | 1.08  | 1.11  | 1.22E-36               | 1.02     | 0.89  | 1.18  | 0.748 |
| Any-cause anemia                                      | rs653178   | 12  | 112007756 | C             | T  | 0.48   | Odds Ratio  | 1.09       | 1.08  | 1.11  | 1.62E-36               | 1.01     | 0.88  | 1.16  | 0.917 |
| Any-cause anemia                                      | rs11065979 | 12  | 112059557 | T             | C  | 0.56   | Odds Ratio  | 1.08       | 1.07  | 1.1   | 4.07E-31               | 1.01     | 0.98  | 1.04  | 0.674 |
| Any-cause anemia                                      | rs11065987 | 12  | 112072424 | G             | A  | 0.58   | Odds Ratio  | 1.08       | 1.06  | 1.09  | 2.13E-27               | 1        | 0.97  | 1.03  | 0.965 |
| Any-cause anemia                                      | rs11065991 | 12  | 112083162 | T             | C  | 0.59   | Odds Ratio  | 1.08       | 1.06  | 1.09  | 1.37E-27               | 1        | 0.97  | 1.03  | 0.954 |
| Asthma                                                | rs10774624 | 12  | 111833788 | G             | A  | 0.49   | Odds Ratio  | 1.02       | 1.01  | 1.03  | 2.77E-03               | 0.98     | 0.94  | 1.02  | 0.409 |
| Asthma                                                | rs7310615  | 12  | 111865049 | C             | G  | 0.48   | Odds Ratio  | 1.02       | 1.01  | 1.04  | 4.72E-04               | 1.06     | 0.92  | 1.2   | 0.428 |
| Asthma                                                | rs3184504  | 12  | 111884608 | T             | C  | 0.48   | Odds Ratio  | 1.02       | 1.01  | 1.04  | 5.97E-04               | NA       | NA    | NA    | NA    |
| Asthma                                                | rs4766578  | 12  | 111904371 | T             | A  | 0.50   | Odds Ratio  | 1.02       | 1.01  | 1.04  | 1.50E-03               | 0.98     | 0.93  | 1.04  | 0.487 |
| Asthma                                                | rs10774625 | 12  | 111910219 | A             | G  | 0.50   | Odds Ratio  | 1.02       | 1.01  | 1.04  | 1.48E-03               | 0.98     | 0.93  | 1.04  | 0.51  |
| Asthma                                                | rs7137828  | 12  | 111932800 | C             | T  | 0.48   | Odds Ratio  | 1.02       | 1.01  | 1.04  | 7.56E-04               | 0.95     | 0.81  | 1.11  | 0.535 |
| Asthma                                                | rs597808   | 12  | 111973358 | A             | G  | 0.48   | Odds Ratio  | 1.02       | 1.01  | 1.04  | 5.25E-04               | 1.04     | 0.9   | 1.2   | 0.598 |
| Asthma                                                | rs653178   | 12  | 112007756 | C             | T  | 0.48   | Odds Ratio  | 1.02       | 1.01  | 1.04  | 4.65E-04               | 1.06     | 0.92  | 1.22  | 0.39  |
| Asthma                                                | rs11065979 | 12  | 112059557 | T             | C  | 0.56   | Odds Ratio  | 1.02       | 1.01  | 1.04  | 5.96E-04               | 1.01     | 0.98  | 1.04  | 0.432 |
| Asthma                                                | rs11065987 | 12  | 112072424 | G             | A  | 0.58   | Odds Ratio  | 1.03       | 1.01  | 1.04  | 2.15E-04               | 1.02     | 0.99  | 1.05  | 0.139 |
| Asthma                                                | rs11065991 | 12  | 112083162 | T             | C  | 0.59   | Odds Ratio  | 1.03       | 1.01  | 1.04  | 2.24E-04               | 1.02     | 0.99  | 1.05  | 0.145 |
| At least one parent top 1% survival in 1900 US cohort | rs10774624 | 12  | 111833788 | G             | A  | 0.49   | Odds Ratio  | 1.1        | 1.04  | 1.16  | 1.48E-03               | 0.93     | 0.77  | 1.11  | 0.404 |
| At least one parent top 1% survival in 1900 US cohort | rs7310615  | 12  | 111865049 | C             | G  | 0.48   | Odds Ratio  | 1.11       | 1.05  | 1.18  | 2.60E-04               | 1.12     | 0.63  | 1.98  | 0.707 |
| At least one parent top 1% survival in 1900 US cohort | rs3184504  | 12  | 111884608 | T             | C  | 0.48   | Odds Ratio  | 1.11       | 1.05  | 1.18  | 2.81E-04               | NA       | NA    | NA    | NA    |
| At least one parent top 1% survival in 1900 US cohort | rs4766578  | 12  | 111904371 | T             | A  | 0.50   | Odds Ratio  | 1.11       | 1.05  | 1.17  | 3.99E-04               | 1        | 0.79  | 1.28  | 0.981 |
| At least one parent top 1% survival in 1900 US cohort | rs10774625 | 12  | 111910219 | A             | G  | 0.50   | Odds Ratio  | 1.11       | 1.05  | 1.17  | 4.22E-04               | 1        | 0.79  | 1.27  | 0.978 |
| At least one parent top 1% survival in 1900 US cohort | rs7137828  | 12  | 111932800 | C             | T  | 0.48   | Odds Ratio  | 1.11       | 1.05  | 1.18  | 2.88E-04               | 1.03     | 0.52  | 2.04  | 0.942 |
| At least one parent top 1% survival in 1900 US cohort | rs597808   | 12  | 111973358 | A             | G  | 0.48   | Odds Ratio  | 1.11       | 1.05  | 1.17  | 4.63E-04               | 0.71     | 0.41  | 1.23  | 0.226 |
| At least one parent top 1% survival in 1900 US cohort | rs653178   | 12  | 112007756 | C             | T  | 0.48   | Odds Ratio  | 1.11       | 1.04  | 1.17  | 5.73E-04               | 0.62     | 0.36  | 1.05  | 0.074 |
| At least one parent top 1% survival in 1900 US cohort | rs11065979 | 12  | 112059557 | T             | C  | 0.56   | Odds Ratio  | 1.12       | 1.06  | 1.19  | 7.50E-05               | 1.11     | 0.98  | 1.27  | 0.105 |
| At least one parent top 1% survival in 1900 US cohort | rs11065987 | 12  | 112072424 | G             | A  | 0.58   | Odds Ratio  | 1.13       | 1.06  | 1.19  | 6.20E-05               | 1.11     | 0.99  | 1.24  | 0.076 |
| At least one parent top 1% survival in 1900 US cohort | rs11065991 | 12  | 112083162 | T             | C  | 0.59   | Odds Ratio  | 1.13       | 1.07  | 1.2   | 2.70E-05               | 1.13     | 1.01  | 1.26  | 0.031 |
| At least one parent top 1% survival in UK Biobank     | rs10774624 | 12  | 111833788 | G             | A  | 0.49   | Odds Ratio  | 1.05       | 1.03  | 1.07  | 2.85E-09               | 1.02     | 0.96  | 1.07  | 0.56  |
| At least one parent top 1% survival in UK Biobank     | rs7310615  | 12  | 111865049 | C             | G  | 0.48   | Odds Ratio  | 1.05       | 1.03  | 1.07  | 3.45E-09               | 0.9      | 0.77  | 1.06  | 0.198 |
| At least one parent top 1% survival in UK Biobank     | rs3184504  | 12  | 111884608 | T             | C  | 0.48   | Odds Ratio  | 1.05       | 1.03  | 1.07  | 1.29E-09               | NA       | NA    | NA    | NA    |
| At least one parent top 1% survival in UK Biobank     | rs4766578  | 12  | 111904371 | T             | A  | 0.50   | Odds Ratio  | 1.05       | 1.03  | 1.07  | 1.17E-09               | 1.03     | 0.96  | 1.1   | 0.43  |
| At least one parent top 1% survival in UK Biobank     | rs10774625 | 12  | 111910219 | A             | G  | 0.50   | Odds Ratio  | 1.05       | 1.03  | 1.07  | 1.03E-09               | 1.03     | 0.96  | 1.1   | 0.376 |
| At least one parent top 1% survival in UK Biobank     | rs7137828  | 12  | 111932800 | C             | T  | 0.48   | Odds Ratio  | 1.05       | 1.03  | 1.07  | 1.05E-09               | 1.07     | 0.88  | 1.29  | 0.517 |
| At least one parent top 1% survival in UK Biobank     | rs597808   | 12  | 111973358 | A             | G  | 0.48   | Odds Ratio  | 1.05       | 1.03  | 1.07  | 1.70E-09               | 0.98     | 0.82  | 1.17  | 0.836 |
| At least one parent top 1% survival in UK Biobank     | rs653178   | 12  | 112007756 | C             | T  | 0.48   | Odds Ratio  | 1.05       | 1.03  | 1.07  | 3.27E-09               | 0.9      | 0.76  | 1.06  | 0.198 |
| At least one parent top 1% survival in UK Biobank     | rs11065979 | 12  | 112059557 | T             | C  | 0.56   | Odds Ratio  | 1.06       | 1.04  | 1.07  | 3.68E-11               | 1.05     | 1.01  | 1.09  | 0.008 |
| At least one parent top 1% survival in UK Biobank     | rs11065987 | 12  | 112072424 | G             | A  | 0.58   | Odds Ratio  | 1.05       | 1.03  | 1.07  | 5.60E-09               | 1.02     | 0.99  | 1.05  | 0.223 |
| At least one parent top 1% survival in UK Biobank     | rs11065991 | 12  | 112083162 | T             | C  | 0.59   | Odds Ratio  | 1.05       | 1.03  | 1.07  | 2.17E-09               | 1.02     | 0.99  | 1.06  | 0.126 |
| Breast cancer (women only)                            | rs10774624 | 12  | 111833788 | G             | A  | 0.49   | Odds Ratio  | 1.05       | 1.02  | 1.08  | 4.09E-04               | 0.97     | 0.9   | 1.05  | 0.485 |
| Breast cancer (women only)                            | rs7310615  | 12  | 111865049 | C             | G  | 0.48   | Odds Ratio  | 1.05       | 1.03  | 1.08  | 1.25E-04               | 0.87     | 0.68  | 1.13  | 0.297 |
| Breast cancer (women only)                            | rs3184504  | 12  | 111884608 | T             | C  | 0.48   | Odds Ratio  | 1.05       | 1.03  | 1.08  | 7.44E-05               | NA       | NA    | NA    | NA    |
| Breast cancer (women only)                            | rs4766578  | 12  | 111904371 | T             | A  | 0.50   | Odds Ratio  | 1.05       | 1.03  | 1.08  | 1.14E-04               | 1        | 0.9   | 1.12  | 0.973 |
| Breast cancer (women only)                            | rs10774625 | 12  | 111910219 | A             | G  | 0.50   | Odds Ratio  | 1.05       | 1.03  | 1.08  | 1.05E-04               | 1.01     | 0.9   | 1.12  | 0.896 |
| Breast cancer (women only)                            | rs7137828  | 12  | 111932800 | C             | T  | 0.48   | Odds Ratio  | 1.05       | 1.03  | 1.08  | 6.04E-05               | 1.13     | 0.82  | 1.54  | 0.453 |

|                            |            |    |           |   |   |      |            |       |       |       |          |       |       |       |       |
|----------------------------|------------|----|-----------|---|---|------|------------|-------|-------|-------|----------|-------|-------|-------|-------|
| Breast cancer (women only) | rs597808   | 12 | 111973358 | A | G | 0.48 | Odds Ratio | 1.06  | 1.03  | 1.08  | 3.86E-05 | 1.29  | 0.98  | 1.71  | 0.074 |
| Breast cancer (women only) | rs653178   | 12 | 112007756 | C | T | 0.48 | Odds Ratio | 1.05  | 1.03  | 1.08  | 5.38E-05 | 1.14  | 0.87  | 1.49  | 0.328 |
| Breast cancer (women only) | rs11065979 | 12 | 112059557 | T | C | 0.56 | Odds Ratio | 1.06  | 1.03  | 1.09  | 2.23E-05 | 1.05  | 0.99  | 1.11  | 0.118 |
| Breast cancer (women only) | rs11065987 | 12 | 112072424 | G | A | 0.58 | Odds Ratio | 1.05  | 1.03  | 1.08  | 1.02E-04 | 1.03  | 0.97  | 1.08  | 0.339 |
| Breast cancer (women only) | rs11065991 | 12 | 112083162 | T | C | 0.59 | Odds Ratio | 1.05  | 1.03  | 1.08  | 1.33E-04 | 1.02  | 0.97  | 1.08  | 0.406 |
| Cancer                     | rs10774624 | 12 | 111833788 | G | A | 0.49 | Odds Ratio | 1.03  | 1.01  | 1.04  | 1.14E-04 | 0.98  | 0.94  | 1.02  | 0.286 |
| Cancer                     | rs7310615  | 12 | 111865049 | C | G | 0.48 | Odds Ratio | 1.03  | 1.02  | 1.04  | 1.07E-05 | 1     | 0.88  | 1.14  | 0.977 |
| Cancer                     | rs3184504  | 12 | 111884608 | T | C | 0.48 | Odds Ratio | 1.03  | 1.02  | 1.04  | 9.49E-06 | NA    | NA    | NA    | NA    |
| Cancer                     | rs4766578  | 12 | 111904371 | T | A | 0.50 | Odds Ratio | 1.03  | 1.02  | 1.04  | 6.59E-06 | 1.02  | 0.97  | 1.08  | 0.393 |
| Cancer                     | rs10774625 | 12 | 111910219 | A | G | 0.50 | Odds Ratio | 1.03  | 1.02  | 1.04  | 6.98E-06 | 1.02  | 0.97  | 1.08  | 0.42  |
| Cancer                     | rs7137828  | 12 | 111932800 | C | T | 0.48 | Odds Ratio | 1.03  | 1.02  | 1.04  | 9.39E-06 | 1.02  | 0.87  | 1.19  | 0.83  |
| Cancer                     | rs597808   | 12 | 111973358 | A | G | 0.48 | Odds Ratio | 1.03  | 1.02  | 1.04  | 1.31E-05 | 0.96  | 0.84  | 1.11  | 0.606 |
| Cancer                     | rs653178   | 12 | 112007756 | C | T | 0.48 | Odds Ratio | 1.03  | 1.02  | 1.04  | 1.10E-05 | 0.99  | 0.87  | 1.14  | 0.909 |
| Cancer                     | rs11065979 | 12 | 112059557 | T | C | 0.56 | Odds Ratio | 1.03  | 1.02  | 1.05  | 2.12E-06 | 1.03  | 1     | 1.06  | 0.082 |
| Cancer                     | rs11065987 | 12 | 112072424 | G | A | 0.58 | Odds Ratio | 1.03  | 1.01  | 1.04  | 3.86E-05 | 1.01  | 0.98  | 1.03  | 0.534 |
| Cancer                     | rs11065991 | 12 | 112083162 | T | C | 0.59 | Odds Ratio | 1.03  | 1.01  | 1.04  | 5.71E-05 | 1.01  | 0.98  | 1.03  | 0.652 |
| Coronary heart disease     | rs10774624 | 12 | 111833788 | G | A | 0.49 | Odds Ratio | 0.95  | 0.93  | 0.96  | 1.25E-10 | 0.96  | 0.91  | 1.01  | 0.131 |
| Coronary heart disease     | rs7310615  | 12 | 111865049 | C | G | 0.48 | Odds Ratio | 0.95  | 0.93  | 0.96  | 3.02E-10 | 0.96  | 0.81  | 1.13  | 0.608 |
| Coronary heart disease     | rs3184504  | 12 | 111884608 | T | C | 0.48 | Odds Ratio | 0.95  | 0.93  | 0.96  | 3.43E-10 | NA    | NA    | NA    | NA    |
| Coronary heart disease     | rs4766578  | 12 | 111904371 | T | A | 0.50 | Odds Ratio | 0.95  | 0.93  | 0.96  | 1.52E-10 | 0.95  | 0.89  | 1.02  | 0.196 |
| Coronary heart disease     | rs10774625 | 12 | 111910219 | A | G | 0.50 | Odds Ratio | 0.95  | 0.93  | 0.96  | 1.96E-10 | 0.96  | 0.89  | 1.03  | 0.259 |
| Coronary heart disease     | rs7137828  | 12 | 111932800 | C | T | 0.48 | Odds Ratio | 0.95  | 0.93  | 0.96  | 2.01E-10 | 0.88  | 0.73  | 1.07  | 0.21  |
| Coronary heart disease     | rs597808   | 12 | 111973358 | A | G | 0.48 | Odds Ratio | 0.95  | 0.93  | 0.96  | 1.70E-10 | 0.88  | 0.74  | 1.05  | 0.149 |
| Coronary heart disease     | rs653178   | 12 | 112007756 | C | T | 0.48 | Odds Ratio | 0.95  | 0.93  | 0.96  | 2.65E-10 | 0.94  | 0.79  | 1.12  | 0.474 |
| Coronary heart disease     | rs11065979 | 12 | 112059557 | T | C | 0.56 | Odds Ratio | 0.95  | 0.94  | 0.97  | 4.04E-08 | 1.01  | 0.97  | 1.05  | 0.695 |
| Coronary heart disease     | rs11065987 | 12 | 112072424 | G | A | 0.58 | Odds Ratio | 0.95  | 0.94  | 0.97  | 3.96E-08 | 1     | 0.96  | 1.03  | 0.83  |
| Coronary heart disease     | rs11065991 | 12 | 112083162 | T | C | 0.59 | Odds Ratio | 0.95  | 0.94  | 0.97  | 2.86E-08 | 0.99  | 0.96  | 1.03  | 0.738 |
| Diastolic blood pressure   | rs10774624 | 12 | 111833788 | G | A | 0.49 | Odds Ratio | -0.04 | -0.04 | -0.03 | 6.40E-50 | 0.01  | -0.01 | 0.02  | 0.431 |
| Diastolic blood pressure   | rs7310615  | 12 | 111865049 | C | G | 0.48 | Odds Ratio | -0.04 | -0.04 | -0.03 | 1.96E-56 | 0     | -0.04 | 0.05  | 0.832 |
| Diastolic blood pressure   | rs3184504  | 12 | 111884608 | T | C | 0.48 | Odds Ratio | -0.04 | -0.04 | -0.03 | 3.67E-57 | NA    | NA    | NA    | NA    |
| Diastolic blood pressure   | rs4766578  | 12 | 111904371 | T | A | 0.50 | Odds Ratio | -0.04 | -0.04 | -0.03 | 4.47E-58 | -0.02 | -0.04 | 0     | 0.015 |
| Diastolic blood pressure   | rs10774625 | 12 | 111910219 | A | G | 0.50 | Odds Ratio | -0.04 | -0.04 | -0.03 | 4.30E-58 | -0.02 | -0.04 | -0.01 | 0.013 |
| Diastolic blood pressure   | rs7137828  | 12 | 111932800 | C | T | 0.48 | Odds Ratio | -0.04 | -0.04 | -0.03 | 1.19E-56 | 0.01  | -0.05 | 0.06  | 0.834 |
| Diastolic blood pressure   | rs597808   | 12 | 111973358 | A | G | 0.48 | Odds Ratio | -0.04 | -0.04 | -0.03 | 8.38E-57 | -0.01 | -0.05 | 0.04  | 0.826 |
| Diastolic blood pressure   | rs653178   | 12 | 112007756 | C | T | 0.48 | Odds Ratio | -0.04 | -0.04 | -0.03 | 2.13E-56 | 0.01  | -0.04 | 0.06  | 0.727 |
| Diastolic blood pressure   | rs11065979 | 12 | 112059557 | T | C | 0.56 | Odds Ratio | -0.03 | -0.04 | -0.03 | 6.00E-43 | 0.01  | 0     | 0.02  | 0.149 |
| Diastolic blood pressure   | rs11065987 | 12 | 112072424 | G | A | 0.58 | Odds Ratio | -0.03 | -0.03 | -0.02 | 9.81E-34 | 0.01  | 0     | 0.02  | 0.003 |
| Diastolic blood pressure   | rs11065991 | 12 | 112083162 | T | C | 0.59 | Odds Ratio | -0.03 | -0.03 | -0.02 | 1.10E-33 | 0.01  | 0     | 0.02  | 0.003 |
| High basophil count        | rs10774624 | 12 | 111833788 | G | A | 0.49 | Odds Ratio | 0.93  | 0.9   | 0.97  | 1.00E-04 | 0.95  | 0.86  | 1.06  | 0.356 |
| High basophil count        | rs7310615  | 12 | 111865049 | C | G | 0.48 | Odds Ratio | 0.93  | 0.9   | 0.97  | 9.32E-05 | 0.81  | 0.58  | 1.11  | 0.192 |
| High basophil count        | rs3184504  | 12 | 111884608 | T | C | 0.48 | Odds Ratio | 0.94  | 0.91  | 0.97  | 1.48E-04 | NA    | NA    | NA    | NA    |
| High basophil count        | rs4766578  | 12 | 111904371 | T | A | 0.50 | Odds Ratio | 0.94  | 0.91  | 0.97  | 1.44E-04 | 0.97  | 0.84  | 1.11  | 0.628 |
| High basophil count        | rs10774625 | 12 | 111910219 | A | G | 0.50 | Odds Ratio | 0.94  | 0.91  | 0.97  | 2.05E-04 | 0.99  | 0.86  | 1.15  | 0.916 |
| High basophil count        | rs7137828  | 12 | 111932800 | C | T | 0.48 | Odds Ratio | 0.94  | 0.91  | 0.97  | 2.26E-04 | 1.28  | 0.83  | 1.96  | 0.262 |
| High basophil count        | rs597808   | 12 | 111973358 | A | G | 0.48 | Odds Ratio | 0.94  | 0.91  | 0.97  | 1.45E-04 | 0.96  | 0.68  | 1.36  | 0.812 |
| High basophil count        | rs653178   | 12 | 112007756 | C | T | 0.48 | Odds Ratio | 0.94  | 0.91  | 0.97  | 1.77E-04 | 1.05  | 0.74  | 1.48  | 0.784 |
| High basophil count        | rs11065979 | 12 | 112059557 | T | C | 0.56 | Odds Ratio | 0.94  | 0.91  | 0.97  | 2.24E-04 | 0.98  | 0.9   | 1.05  | 0.536 |
| High basophil count        | rs11065987 | 12 | 112072424 | G | A | 0.58 | Odds Ratio | 0.95  | 0.92  | 0.98  | 1.93E-03 | 1.01  | 0.95  | 1.08  | 0.779 |
| High basophil count        | rs11065991 | 12 | 112083162 | T | C | 0.59 | Odds Ratio | 0.95  | 0.92  | 0.98  | 2.37E-03 | 1.01  | 0.95  | 1.08  | 0.697 |
| High eosinophil count      | rs10774624 | 12 | 111833788 | G | A | 0.49 | Odds Ratio | 0.88  | 0.82  | 0.94  | 1.12E-04 | 1.02  | 0.82  | 1.25  | 0.874 |
| High eosinophil count      | rs7310615  | 12 | 111865049 | C | G | 0.48 | Odds Ratio | 0.87  | 0.81  | 0.93  | 3.85E-05 | 0.96  | 0.5   | 1.85  | 0.911 |
| High eosinophil count      | rs3184504  | 12 | 111884608 | T | C | 0.48 | Odds Ratio | 0.87  | 0.82  | 0.93  | 3.69E-05 | NA    | NA    | NA    | NA    |
| High eosinophil count      | rs4766578  | 12 | 111904371 | T | A | 0.50 | Odds Ratio | 0.88  | 0.82  | 0.94  | 8.79E-05 | 1.06  | 0.79  | 1.43  | 0.692 |

|                                         |            |    |           |   |   |      |            |      |      |      |          |      |      |      |       |
|-----------------------------------------|------------|----|-----------|---|---|------|------------|------|------|------|----------|------|------|------|-------|
| High eosinophill count                  | rs10774625 | 12 | 111910219 | A | G | 0.50 | Odds Ratio | 0.88 | 0.82 | 0.94 | 9.31E-05 | 1.07 | 0.8  | 1.43 | 0.661 |
| High eosinophill count                  | rs7137828  | 12 | 111932800 | C | T | 0.48 | Odds Ratio | 0.87 | 0.81 | 0.93 | 2.50E-05 | 0.64 | 0.32 | 1.28 | 0.208 |
| High eosinophill count                  | rs597808   | 12 | 111973358 | A | G | 0.48 | Odds Ratio | 0.87 | 0.82 | 0.93 | 3.73E-05 | 0.94 | 0.47 | 1.88 | 0.864 |
| High eosinophill count                  | rs653178   | 12 | 112007756 | C | T | 0.48 | Odds Ratio | 0.87 | 0.82 | 0.93 | 3.52E-05 | 0.9  | 0.46 | 1.76 | 0.754 |
| High eosinophill count                  | rs11065979 | 12 | 112059557 | T | C | 0.56 | Odds Ratio | 0.9  | 0.84 | 0.96 | 1.42E-03 | 1.09 | 0.94 | 1.26 | 0.236 |
| High eosinophill count                  | rs11065987 | 12 | 112072424 | G | A | 0.58 | Odds Ratio | 0.91 | 0.85 | 0.97 | 3.16E-03 | 1.07 | 0.95 | 1.21 | 0.275 |
| High eosinophill count                  | rs11065991 | 12 | 112083162 | T | C | 0.59 | Odds Ratio | 0.91 | 0.85 | 0.97 | 3.53E-03 | 1.07 | 0.95 | 1.21 | 0.251 |
| High lymphocyte count                   | rs10774624 | 12 | 111833788 | G | A | 0.49 | Odds Ratio | 0.84 | 0.78 | 0.91 | 3.24E-06 | 0.92 | 0.73 | 1.15 | 0.448 |
| High lymphocyte count                   | rs7310615  | 12 | 111865049 | C | G | 0.48 | Odds Ratio | 0.84 | 0.78 | 0.9  | 2.18E-06 | 0.69 | 0.35 | 1.37 | 0.292 |
| High lymphocyte count                   | rs3184504  | 12 | 111884608 | T | C | 0.48 | Odds Ratio | 0.84 | 0.79 | 0.91 | 3.23E-06 | NA   | NA   | NA   | NA    |
| High lymphocyte count                   | rs4766578  | 12 | 111904371 | T | A | 0.50 | Odds Ratio | 0.85 | 0.79 | 0.91 | 5.77E-06 | 0.99 | 0.72 | 1.37 | 0.975 |
| High lymphocyte count                   | rs10774625 | 12 | 111910219 | A | G | 0.50 | Odds Ratio | 0.85 | 0.79 | 0.91 | 6.86E-06 | 1.02 | 0.74 | 1.4  | 0.906 |
| High lymphocyte count                   | rs7137828  | 12 | 111932800 | C | T | 0.48 | Odds Ratio | 0.85 | 0.79 | 0.91 | 4.78E-06 | 1.48 | 0.57 | 3.86 | 0.422 |
| High lymphocyte count                   | rs597808   | 12 | 111973358 | A | G | 0.48 | Odds Ratio | 0.84 | 0.79 | 0.91 | 3.16E-06 | 0.9  | 0.43 | 1.89 | 0.78  |
| High lymphocyte count                   | rs653178   | 12 | 112007756 | C | T | 0.48 | Odds Ratio | 0.85 | 0.79 | 0.91 | 4.75E-06 | 1.26 | 0.6  | 2.67 | 0.544 |
| High lymphocyte count                   | rs11065979 | 12 | 112059557 | T | C | 0.56 | Odds Ratio | 0.87 | 0.81 | 0.93 | 8.61E-05 | 1.05 | 0.9  | 1.23 | 0.541 |
| High lymphocyte count                   | rs11065987 | 12 | 112072424 | G | A | 0.58 | Odds Ratio | 0.88 | 0.82 | 0.95 | 5.86E-04 | 1.07 | 0.94 | 1.23 | 0.295 |
| High lymphocyte count                   | rs11065991 | 12 | 112083162 | T | C | 0.59 | Odds Ratio | 0.88 | 0.82 | 0.95 | 8.17E-04 | 1.08 | 0.95 | 1.24 | 0.228 |
| High neutrophill count                  | rs10774624 | 12 | 111833788 | G | A | 0.49 | Odds Ratio | 0.96 | 0.94 | 0.98 | 5.47E-04 | 1.03 | 0.95 | 1.11 | 0.456 |
| High neutrophill count                  | rs7310615  | 12 | 111865049 | C | G | 0.48 | Odds Ratio | 0.96 | 0.93 | 0.98 | 1.80E-04 | 1.16 | 0.92 | 1.48 | 0.209 |
| High neutrophill count                  | rs3184504  | 12 | 111884608 | T | C | 0.48 | Odds Ratio | 0.95 | 0.93 | 0.98 | 9.88E-05 | NA   | NA   | NA   | NA    |
| High neutrophill count                  | rs4766578  | 12 | 111904371 | T | A | 0.50 | Odds Ratio | 0.96 | 0.94 | 0.98 | 5.49E-04 | 1.08 | 0.97 | 1.2  | 0.155 |
| High neutrophill count                  | rs10774625 | 12 | 111910219 | A | G | 0.50 | Odds Ratio | 0.96 | 0.94 | 0.98 | 5.40E-04 | 1.08 | 0.97 | 1.19 | 0.169 |
| High neutrophill count                  | rs7137828  | 12 | 111932800 | C | T | 0.48 | Odds Ratio | 0.96 | 0.93 | 0.98 | 2.23E-04 | 1.43 | 1.05 | 1.96 | 0.024 |
| High neutrophill count                  | rs597808   | 12 | 111973358 | A | G | 0.48 | Odds Ratio | 0.96 | 0.93 | 0.98 | 2.29E-04 | 1.31 | 1.01 | 1.71 | 0.044 |
| High neutrophill count                  | rs653178   | 12 | 112007756 | C | T | 0.48 | Odds Ratio | 0.96 | 0.93 | 0.98 | 2.97E-04 | 1.41 | 1.1  | 1.81 | 0.007 |
| High neutrophill count                  | rs11065979 | 12 | 112059557 | T | C | 0.56 | Odds Ratio | 0.96 | 0.94 | 0.99 | 2.57E-03 | 1.03 | 0.98 | 1.09 | 0.258 |
| High neutrophill count                  | rs11065987 | 12 | 112072424 | G | A | 0.58 | Odds Ratio | 0.97 | 0.94 | 0.99 | 6.47E-03 | 1.03 | 0.98 | 1.08 | 0.238 |
| High neutrophill count                  | rs11065991 | 12 | 112083162 | T | C | 0.59 | Odds Ratio | 0.97 | 0.94 | 0.99 | 5.35E-03 | 1.02 | 0.98 | 1.07 | 0.294 |
| High platelet count                     | rs10774624 | 12 | 111833788 | G | A | 0.49 | Odds Ratio | 0.79 | 0.77 | 0.82 | 1.12E-36 | 1.06 | 0.95 | 1.19 | 0.295 |
| High platelet count                     | rs7310615  | 12 | 111865049 | C | G | 0.48 | Odds Ratio | 0.78 | 0.75 | 0.81 | 2.25E-42 | 0.95 | 0.66 | 1.35 | 0.765 |
| High platelet count                     | rs3184504  | 12 | 111884608 | T | C | 0.48 | Odds Ratio | 0.78 | 0.75 | 0.81 | 1.30E-42 | NA   | NA   | NA   | NA    |
| High platelet count                     | rs4766578  | 12 | 111904371 | T | A | 0.50 | Odds Ratio | 0.79 | 0.76 | 0.82 | 1.38E-38 | 1.13 | 0.95 | 1.33 | 0.16  |
| High platelet count                     | rs10774625 | 12 | 111910219 | A | G | 0.50 | Odds Ratio | 0.79 | 0.76 | 0.82 | 2.75E-38 | 1.14 | 0.97 | 1.35 | 0.113 |
| High platelet count                     | rs7137828  | 12 | 111932800 | C | T | 0.48 | Odds Ratio | 0.78 | 0.75 | 0.81 | 1.86E-42 | 0.94 | 0.61 | 1.44 | 0.777 |
| High platelet count                     | rs597808   | 12 | 111973358 | A | G | 0.48 | Odds Ratio | 0.78 | 0.75 | 0.81 | 9.33E-42 | 1.19 | 0.81 | 1.77 | 0.378 |
| High platelet count                     | rs653178   | 12 | 112007756 | C | T | 0.48 | Odds Ratio | 0.78 | 0.76 | 0.81 | 1.12E-41 | 1.21 | 0.83 | 1.76 | 0.323 |
| High platelet count                     | rs11065979 | 12 | 112059557 | T | C | 0.56 | Odds Ratio | 0.81 | 0.78 | 0.83 | 5.80E-33 | 1.03 | 0.96 | 1.12 | 0.412 |
| High platelet count                     | rs11065987 | 12 | 112072424 | G | A | 0.58 | Odds Ratio | 0.82 | 0.79 | 0.85 | 6.74E-28 | 1.05 | 0.98 | 1.12 | 0.152 |
| High platelet count                     | rs11065991 | 12 | 112083162 | T | C | 0.59 | Odds Ratio | 0.82 | 0.79 | 0.85 | 1.34E-27 | 1.05 | 0.99 | 1.12 | 0.129 |
| High red blood cell (erythrocyte) count | rs10774624 | 12 | 111833788 | G | A | 0.49 | Odds Ratio | 0.88 | 0.84 | 0.93 | 1.80E-06 | 0.96 | 0.82 | 1.12 | 0.599 |
| High red blood cell (erythrocyte) count | rs7310615  | 12 | 111865049 | C | G | 0.48 | Odds Ratio | 0.88 | 0.84 | 0.93 | 1.95E-06 | 1.21 | 0.73 | 2.01 | 0.455 |
| High red blood cell (erythrocyte) count | rs3184504  | 12 | 111884608 | T | C | 0.48 | Odds Ratio | 0.88 | 0.84 | 0.93 | 1.18E-06 | NA   | NA   | NA   | NA    |
| High red blood cell (erythrocyte) count | rs4766578  | 12 | 111904371 | T | A | 0.50 | Odds Ratio | 0.88 | 0.84 | 0.93 | 1.18E-06 | 0.94 | 0.75 | 1.16 | 0.554 |
| High red blood cell (erythrocyte) count | rs10774625 | 12 | 111910219 | A | G | 0.50 | Odds Ratio | 0.88 | 0.84 | 0.93 | 1.06E-06 | 0.93 | 0.75 | 1.15 | 0.489 |
| High red blood cell (erythrocyte) count | rs7137828  | 12 | 111932800 | C | T | 0.48 | Odds Ratio | 0.88 | 0.84 | 0.93 | 1.29E-06 | 1    | 0.54 | 1.85 | 0.994 |
| High red blood cell (erythrocyte) count | rs597808   | 12 | 111973358 | A | G | 0.48 | Odds Ratio | 0.88 | 0.84 | 0.93 | 1.22E-06 | 0.96 | 0.56 | 1.62 | 0.865 |
| High red blood cell (erythrocyte) count | rs653178   | 12 | 112007756 | C | T | 0.48 | Odds Ratio | 0.89 | 0.84 | 0.93 | 2.03E-06 | 1.27 | 0.75 | 2.14 | 0.375 |
| High red blood cell (erythrocyte) count | rs11065979 | 12 | 112059557 | T | C | 0.56 | Odds Ratio | 0.9  | 0.86 | 0.95 | 7.88E-05 | 1.06 | 0.95 | 1.18 | 0.332 |
| High red blood cell (erythrocyte) count | rs11065987 | 12 | 112072424 | G | A | 0.58 | Odds Ratio | 0.92 | 0.87 | 0.96 | 6.79E-04 | 1.07 | 0.98 | 1.18 | 0.145 |
| High red blood cell (erythrocyte) count | rs11065991 | 12 | 112083162 | T | C | 0.59 | Odds Ratio | 0.91 | 0.87 | 0.96 | 4.79E-04 | 1.06 | 0.97 | 1.17 | 0.206 |
| High reticulocyte count                 | rs10774624 | 12 | 111833788 | G | A | 0.49 | Odds Ratio | 0.88 | 0.86 | 0.9  | 1.25E-23 | 0.95 | 0.88 | 1.03 | 0.193 |
| High reticulocyte count                 | rs7310615  | 12 | 111865049 | C | G | 0.48 | Odds Ratio | 0.88 | 0.86 | 0.9  | 4.29E-24 | 0.95 | 0.74 | 1.21 | 0.65  |

|                                         |            |    |           |   |   |      |            |      |      |      |          |      |      |      |       |
|-----------------------------------------|------------|----|-----------|---|---|------|------------|------|------|------|----------|------|------|------|-------|
| High reticulocyte count                 | rs3184504  | 12 | 111884608 | T | C | 0.48 | Odds Ratio | 0.88 | 0.86 | 0.9  | 4.01E-24 | NA   | NA   | NA   | NA    |
| High reticulocyte count                 | rs4766578  | 12 | 111904371 | T | A | 0.50 | Odds Ratio | 0.88 | 0.86 | 0.9  | 1.28E-23 | 0.96 | 0.86 | 1.07 | 0.465 |
| High reticulocyte count                 | rs10774625 | 12 | 111910219 | A | G | 0.50 | Odds Ratio | 0.88 | 0.86 | 0.9  | 1.86E-23 | 0.97 | 0.87 | 1.08 | 0.555 |
| High reticulocyte count                 | rs7137828  | 12 | 111932800 | C | T | 0.48 | Odds Ratio | 0.88 | 0.86 | 0.9  | 1.13E-23 | 1.14 | 0.83 | 1.55 | 0.415 |
| High reticulocyte count                 | rs597808   | 12 | 111973358 | A | G | 0.48 | Odds Ratio | 0.88 | 0.86 | 0.9  | 1.78E-23 | 1.16 | 0.89 | 1.52 | 0.277 |
| High reticulocyte count                 | rs653178   | 12 | 112007756 | C | T | 0.48 | Odds Ratio | 0.88 | 0.86 | 0.9  | 2.24E-23 | 1.18 | 0.91 | 1.53 | 0.204 |
| High reticulocyte count                 | rs11065979 | 12 | 112059557 | T | C | 0.56 | Odds Ratio | 0.89 | 0.87 | 0.91 | 5.21E-21 | 0.98 | 0.93 | 1.04 | 0.538 |
| High reticulocyte count                 | rs11065987 | 12 | 112072424 | G | A | 0.58 | Odds Ratio | 0.9  | 0.87 | 0.92 | 4.32E-18 | 1    | 0.95 | 1.05 | 0.984 |
| High reticulocyte count                 | rs11065991 | 12 | 112083162 | T | C | 0.59 | Odds Ratio | 0.9  | 0.88 | 0.92 | 5.93E-18 | 1    | 0.96 | 1.05 | 0.944 |
| High white blood cell (leukocyte) count | rs10774624 | 12 | 111833788 | G | A | 0.49 | Odds Ratio | 0.91 | 0.9  | 0.93 | 2.66E-24 | 1.05 | 0.99 | 1.11 | 0.099 |
| High white blood cell (leukocyte) count | rs7310615  | 12 | 111865049 | C | G | 0.48 | Odds Ratio | 0.9  | 0.89 | 0.92 | 2.47E-28 | 1.17 | 0.98 | 1.4  | 0.079 |
| High white blood cell (leukocyte) count | rs3184504  | 12 | 111884608 | T | C | 0.48 | Odds Ratio | 0.9  | 0.89 | 0.92 | 1.73E-29 | NA   | NA   | NA   | NA    |
| High white blood cell (leukocyte) count | rs4766578  | 12 | 111904371 | T | A | 0.50 | Odds Ratio | 0.91 | 0.89 | 0.92 | 5.10E-28 | 1    | 0.92 | 1.08 | 0.961 |
| High white blood cell (leukocyte) count | rs10774625 | 12 | 111910219 | A | G | 0.50 | Odds Ratio | 0.91 | 0.89 | 0.92 | 6.43E-28 | 1    | 0.93 | 1.08 | 0.994 |
| High white blood cell (leukocyte) count | rs7137828  | 12 | 111932800 | C | T | 0.48 | Odds Ratio | 0.91 | 0.89 | 0.92 | 3.25E-28 | 1.37 | 1.09 | 1.73 | 0.007 |
| High white blood cell (leukocyte) count | rs597808   | 12 | 111973358 | A | G | 0.48 | Odds Ratio | 0.9  | 0.89 | 0.92 | 2.57E-28 | 1.22 | 1    | 1.48 | 0.046 |
| High white blood cell (leukocyte) count | rs653178   | 12 | 112007756 | C | T | 0.48 | Odds Ratio | 0.91 | 0.89 | 0.92 | 9.73E-28 | 1.36 | 1.13 | 1.64 | 0.001 |
| High white blood cell (leukocyte) count | rs11065979 | 12 | 112059557 | T | C | 0.56 | Odds Ratio | 0.91 | 0.89 | 0.93 | 6.78E-25 | 0.99 | 0.95 | 1.03 | 0.754 |
| High white blood cell (leukocyte) count | rs11065987 | 12 | 112072424 | G | A | 0.58 | Odds Ratio | 0.91 | 0.9  | 0.93 | 6.42E-23 | 0.99 | 0.96 | 1.03 | 0.712 |
| High white blood cell (leukocyte) count | rs11065991 | 12 | 112083162 | T | C | 0.59 | Odds Ratio | 0.91 | 0.9  | 0.93 | 9.17E-23 | 0.99 | 0.96 | 1.03 | 0.75  |
| Hypertension                            | rs10774624 | 12 | 111833788 | G | A | 0.49 | Odds Ratio | 0.94 | 0.93 | 0.95 | 6.05E-33 | 1.02 | 0.99 | 1.05 | 0.193 |
| Hypertension                            | rs7310615  | 12 | 111865049 | C | G | 0.48 | Odds Ratio | 0.94 | 0.93 | 0.94 | 4.55E-38 | 1.04 | 0.94 | 1.15 | 0.444 |
| Hypertension                            | rs3184504  | 12 | 111884608 | T | C | 0.48 | Odds Ratio | 0.94 | 0.93 | 0.94 | 6.90E-39 | NA   | NA   | NA   | NA    |
| Hypertension                            | rs4766578  | 12 | 111904371 | T | A | 0.50 | Odds Ratio | 0.94 | 0.93 | 0.95 | 7.15E-38 | 0.98 | 0.94 | 1.03 | 0.434 |
| Hypertension                            | rs10774625 | 12 | 111910219 | A | G | 0.50 | Odds Ratio | 0.94 | 0.93 | 0.95 | 1.70E-37 | 0.99 | 0.95 | 1.03 | 0.599 |
| Hypertension                            | rs7137828  | 12 | 111932800 | C | T | 0.48 | Odds Ratio | 0.94 | 0.93 | 0.95 | 6.77E-38 | 1.1  | 0.97 | 1.24 | 0.124 |
| Hypertension                            | rs597808   | 12 | 111973358 | A | G | 0.48 | Odds Ratio | 0.94 | 0.93 | 0.95 | 5.83E-38 | 1.06 | 0.95 | 1.18 | 0.274 |
| Hypertension                            | rs653178   | 12 | 112007756 | C | T | 0.48 | Odds Ratio | 0.94 | 0.93 | 0.95 | 2.17E-37 | 1.12 | 1.01 | 1.24 | 0.036 |
| Hypertension                            | rs11065979 | 12 | 112059557 | T | C | 0.56 | Odds Ratio | 0.95 | 0.94 | 0.96 | 4.32E-26 | 1.03 | 1.01 | 1.06 | 0.006 |
| Hypertension                            | rs11065987 | 12 | 112072424 | G | A | 0.58 | Odds Ratio | 0.95 | 0.94 | 0.96 | 2.85E-24 | 1.02 | 1    | 1.04 | 0.049 |
| Hypertension                            | rs11065991 | 12 | 112083162 | T | C | 0.59 | Odds Ratio | 0.95 | 0.94 | 0.96 | 3.30E-24 | 1.02 | 1    | 1.04 | 0.049 |
| Hypothyroidism                          | rs10774624 | 12 | 111833788 | G | A | 0.49 | Odds Ratio | 0.82 | 0.81 | 0.84 | 1.18E-83 | 1.02 | 0.96 | 1.09 | 0.545 |
| Hypothyroidism                          | rs7310615  | 12 | 111865049 | C | G | 0.48 | Odds Ratio | 0.81 | 0.8  | 0.83 | 1.99E-93 | 1.02 | 0.84 | 1.24 | 0.824 |
| Hypothyroidism                          | rs3184504  | 12 | 111884608 | T | C | 0.48 | Odds Ratio | 0.81 | 0.8  | 0.83 | 1.42E-94 | NA   | NA   | NA   | NA    |
| Hypothyroidism                          | rs4766578  | 12 | 111904371 | T | A | 0.50 | Odds Ratio | 0.82 | 0.8  | 0.84 | 2.31E-88 | 1.03 | 0.94 | 1.12 | 0.556 |
| Hypothyroidism                          | rs10774625 | 12 | 111910219 | A | G | 0.50 | Odds Ratio | 0.82 | 0.8  | 0.84 | 1.44E-87 | 1.04 | 0.95 | 1.14 | 0.357 |
| Hypothyroidism                          | rs7137828  | 12 | 111932800 | C | T | 0.48 | Odds Ratio | 0.81 | 0.8  | 0.83 | 3.96E-93 | 1.14 | 0.89 | 1.46 | 0.282 |
| Hypothyroidism                          | rs597808   | 12 | 111973358 | A | G | 0.48 | Odds Ratio | 0.81 | 0.8  | 0.83 | 6.55E-93 | 1.11 | 0.9  | 1.38 | 0.325 |
| Hypothyroidism                          | rs653178   | 12 | 112007756 | C | T | 0.48 | Odds Ratio | 0.82 | 0.8  | 0.83 | 6.71E-93 | 1.1  | 0.9  | 1.35 | 0.352 |
| Hypothyroidism                          | rs11065979 | 12 | 112059557 | T | C | 0.56 | Odds Ratio | 0.83 | 0.81 | 0.85 | 6.50E-78 | 1    | 0.95 | 1.04 | 0.861 |
| Hypothyroidism                          | rs11065987 | 12 | 112072424 | G | A | 0.58 | Odds Ratio | 0.84 | 0.82 | 0.85 | 5.88E-72 | 0.99 | 0.96 | 1.03 | 0.656 |
| Hypothyroidism                          | rs11065991 | 12 | 112083162 | T | C | 0.59 | Odds Ratio | 0.83 | 0.82 | 0.85 | 9.47E-73 | 0.99 | 0.95 | 1.02 | 0.504 |
| Low muscle mass                         | rs10774624 | 12 | 111833788 | G | A | 0.49 | Odds Ratio | 0.97 | 0.96 | 0.98 | 3.13E-08 | 0.99 | 0.96 | 1.02 | 0.526 |
| Low muscle mass                         | rs7310615  | 12 | 111865049 | C | G | 0.48 | Odds Ratio | 0.97 | 0.96 | 0.98 | 1.05E-08 | 0.94 | 0.86 | 1.03 | 0.207 |
| Low muscle mass                         | rs3184504  | 12 | 111884608 | T | C | 0.48 | Odds Ratio | 0.97 | 0.96 | 0.98 | 1.87E-08 | NA   | NA   | NA   | NA    |
| Low muscle mass                         | rs4766578  | 12 | 111904371 | T | A | 0.50 | Odds Ratio | 0.97 | 0.96 | 0.98 | 1.41E-08 | 0.98 | 0.94 | 1.02 | 0.38  |
| Low muscle mass                         | rs10774625 | 12 | 111910219 | A | G | 0.50 | Odds Ratio | 0.97 | 0.96 | 0.98 | 1.24E-08 | 0.98 | 0.94 | 1.02 | 0.328 |
| Low muscle mass                         | rs7137828  | 12 | 111932800 | C | T | 0.48 | Odds Ratio | 0.97 | 0.96 | 0.98 | 1.88E-08 | 0.99 | 0.88 | 1.1  | 0.82  |
| Low muscle mass                         | rs597808   | 12 | 111973358 | A | G | 0.48 | Odds Ratio | 0.97 | 0.96 | 0.98 | 1.31E-08 | 0.96 | 0.87 | 1.05 | 0.365 |
| Low muscle mass                         | rs653178   | 12 | 112007756 | C | T | 0.48 | Odds Ratio | 0.97 | 0.96 | 0.98 | 8.43E-09 | 0.92 | 0.84 | 1.01 | 0.095 |
| Low muscle mass                         | rs11065979 | 12 | 112059557 | T | C | 0.56 | Odds Ratio | 0.98 | 0.97 | 0.98 | 3.55E-07 | 1    | 0.98 | 1.02 | 0.956 |
| Low muscle mass                         | rs11065987 | 12 | 112072424 | G | A | 0.58 | Odds Ratio | 0.98 | 0.97 | 0.99 | 5.27E-07 | 1    | 0.98 | 1.02 | 0.703 |
| Low muscle mass                         | rs11065991 | 12 | 112083162 | T | C | 0.59 | Odds Ratio | 0.98 | 0.97 | 0.99 | 6.02E-07 | 1    | 0.98 | 1.02 | 0.733 |



|                                 |            |    |           |   |   |      |            |       |       |       |          |       |       |       |       |
|---------------------------------|------------|----|-----------|---|---|------|------------|-------|-------|-------|----------|-------|-------|-------|-------|
| Reaction time (log transformed) | rs10774624 | 12 | 111833788 | G | A | 0.49 | SD change  | -0.01 | -0.02 | -0.01 | 9.47E-09 | -0.01 | -0.02 | 0.01  | 0.339 |
| Reaction time (log transformed) | rs7310615  | 12 | 111865049 | C | G | 0.48 | SD change  | -0.01 | -0.02 | -0.01 | 6.42E-09 | -0.02 | -0.06 | 0.02  | 0.318 |
| Reaction time (log transformed) | rs3184504  | 12 | 111884608 | T | C | 0.48 | SD change  | -0.01 | -0.02 | -0.01 | 9.85E-09 | NA    | NA    | NA    | NA    |
| Reaction time (log transformed) | rs4766578  | 12 | 111904371 | T | A | 0.50 | SD change  | -0.01 | -0.02 | -0.01 | 2.43E-10 | -0.03 | -0.05 | -0.01 | 0.001 |
| Reaction time (log transformed) | rs10774625 | 12 | 111910219 | A | G | 0.50 | SD change  | -0.01 | -0.02 | -0.01 | 1.45E-10 | -0.03 | -0.05 | -0.01 | 0     |
| Reaction time (log transformed) | rs7137828  | 12 | 111932800 | C | T | 0.48 | SD change  | -0.01 | -0.02 | -0.01 | 1.91E-08 | 0.03  | -0.02 | 0.08  | 0.267 |
| Reaction time (log transformed) | rs597808   | 12 | 111973358 | A | G | 0.48 | SD change  | -0.01 | -0.02 | -0.01 | 2.06E-08 | 0.02  | -0.02 | 0.07  | 0.291 |
| Reaction time (log transformed) | rs653178   | 12 | 112007756 | C | T | 0.48 | SD change  | -0.01 | -0.02 | -0.01 | 1.00E-08 | -0.01 | -0.05 | 0.04  | 0.805 |
| Reaction time (log transformed) | rs11065979 | 12 | 112059557 | T | C | 0.56 | SD change  | -0.01 | -0.02 | -0.01 | 2.01E-09 | -0.01 | -0.02 | 0     | 0.056 |
| Reaction time (log transformed) | rs11065987 | 12 | 112072424 | G | A | 0.58 | SD change  | -0.01 | -0.02 | -0.01 | 9.42E-09 | -0.01 | -0.02 | 0     | 0.108 |
| Reaction time (log transformed) | rs11065991 | 12 | 112083162 | T | C | 0.59 | SD change  | -0.01 | -0.02 | -0.01 | 5.05E-09 | -0.01 | -0.02 | 0     | 0.07  |
| Systolic blood pressure         | rs10774624 | 12 | 111833788 | G | A | 0.49 | SD change  | -0.02 | -0.02 | -0.01 | 2.66E-16 | 0.01  | -0.01 | 0.02  | 0.472 |
| Systolic blood pressure         | rs7310615  | 12 | 111865049 | C | G | 0.48 | SD change  | -0.02 | -0.02 | -0.02 | 1.25E-18 | 0     | -0.04 | 0.05  | 0.833 |
| Systolic blood pressure         | rs3184504  | 12 | 111884608 | T | C | 0.48 | SD change  | -0.02 | -0.02 | -0.02 | 6.81E-19 | NA    | NA    | NA    | NA    |
| Systolic blood pressure         | rs4766578  | 12 | 111904371 | T | A | 0.50 | SD change  | -0.02 | -0.02 | -0.02 | 1.79E-19 | -0.02 | -0.03 | 0     | 0.093 |
| Systolic blood pressure         | rs10774625 | 12 | 111910219 | A | G | 0.50 | SD change  | -0.02 | -0.02 | -0.02 | 1.69E-19 | -0.02 | -0.03 | 0     | 0.086 |
| Systolic blood pressure         | rs7137828  | 12 | 111932800 | C | T | 0.48 | SD change  | -0.02 | -0.02 | -0.02 | 8.59E-19 | 0     | -0.05 | 0.05  | 0.948 |
| Systolic blood pressure         | rs597808   | 12 | 111973358 | A | G | 0.48 | SD change  | -0.02 | -0.02 | -0.02 | 9.96E-19 | 0     | -0.05 | 0.05  | 0.983 |
| Systolic blood pressure         | rs653178   | 12 | 112007756 | C | T | 0.48 | SD change  | -0.02 | -0.02 | -0.02 | 2.22E-18 | 0.02  | -0.02 | 0.07  | 0.357 |
| Systolic blood pressure         | rs11065979 | 12 | 112059557 | T | C | 0.56 | SD change  | -0.02 | -0.02 | -0.01 | 2.63E-15 | 0     | -0.01 | 0.01  | 0.826 |
| Systolic blood pressure         | rs11065987 | 12 | 112072424 | G | A | 0.58 | SD change  | -0.02 | -0.02 | -0.01 | 6.70E-12 | 0.01  | 0     | 0.01  | 0.147 |
| Systolic blood pressure         | rs11065991 | 12 | 112083162 | T | C | 0.59 | SD change  | -0.02 | -0.02 | -0.01 | 8.82E-12 | 0.01  | 0     | 0.02  | 0.132 |
| Type 1 diabetes                 | rs10774624 | 12 | 111833788 | G | A | 0.49 | Odds Ratio | 0.89  | 0.84  | 0.94  | 3.27E-05 | 1.1   | 0.93  | 1.31  | 0.273 |
| Type 1 diabetes                 | rs7310615  | 12 | 111865049 | C | G | 0.48 | Odds Ratio | 0.88  | 0.83  | 0.93  | 3.10E-06 | 1.17  | 0.67  | 2.02  | 0.583 |
| Type 1 diabetes                 | rs3184504  | 12 | 111884608 | T | C | 0.48 | Odds Ratio | 0.88  | 0.83  | 0.93  | 2.10E-06 | NA    | NA    | NA    | NA    |
| Type 1 diabetes                 | rs4766578  | 12 | 111904371 | T | A | 0.50 | Odds Ratio | 0.89  | 0.84  | 0.94  | 1.58E-05 | 1.19  | 0.92  | 1.54  | 0.19  |
| Type 1 diabetes                 | rs10774625 | 12 | 111910219 | A | G | 0.50 | Odds Ratio | 0.89  | 0.84  | 0.94  | 2.04E-05 | 1.22  | 0.94  | 1.58  | 0.127 |
| Type 1 diabetes                 | rs7137828  | 12 | 111932800 | C | T | 0.48 | Odds Ratio | 0.88  | 0.83  | 0.93  | 2.25E-06 | 0.99  | 0.51  | 1.91  | 0.97  |
| Type 1 diabetes                 | rs597808   | 12 | 111973358 | A | G | 0.48 | Odds Ratio | 0.87  | 0.83  | 0.92  | 8.19E-07 | 0.57  | 0.35  | 0.93  | 0.024 |
| Type 1 diabetes                 | rs653178   | 12 | 112007756 | C | T | 0.48 | Odds Ratio | 0.88  | 0.83  | 0.92  | 1.52E-06 | 0.78  | 0.45  | 1.33  | 0.356 |
| Type 1 diabetes                 | rs11065979 | 12 | 112059557 | T | C | 0.56 | Odds Ratio | 0.89  | 0.84  | 0.94  | 2.41E-05 | 1.01  | 0.89  | 1.14  | 0.905 |
| Type 1 diabetes                 | rs11065987 | 12 | 112072424 | G | A | 0.58 | Odds Ratio | 0.89  | 0.84  | 0.94  | 3.02E-05 | 0.99  | 0.89  | 1.1   | 0.841 |
| Type 1 diabetes                 | rs11065991 | 12 | 112083162 | T | C | 0.59 | Odds Ratio | 0.89  | 0.84  | 0.94  | 2.28E-05 | 0.98  | 0.89  | 1.09  | 0.743 |

1. P-values highlighted in red if smaller than the Bonferroni-corrected level of 0.00096

2. Both SNP effect and conditional SNP effect adjusted for age, sex, assessment, array type, and PC1-PC5

3. Results of rs3184504 marked by grey background
